# Supplementary material for: The degree of processing of foods which are most widely consumed by the French elderly population is associated with satiety and glycemic potentials and nutrient profiles
Source: Royal Society of Chemistry journal article supplement (doi:10.1039/c6fo01495j), 2017-01-01
Supplement: c6fo01495j1.pdf [file c6fo01495j1.pdf]

**Supplemental Table 1** Consumption, macro- and micro-nutritional composition, nutrient profile, satiety and glycemic potentials of ready-to-eat foods usually consumed by the French elderly population (aged  $\geq 65$  years).
