# Supplementary material for: The degree of processing of foods which are most widely consumed by the French elderly population is associated with satiety and glycemic potentials and nutrient profiles
Source: Royal Society of Chemistry journal article supplement (doi:10.1039/c6fo01495j), 2017-01-01
Supplement: c6fo01495j2.xlsx [file c6fo01495j2.xlsx]

## Sheet: Supplemental Table 1
Supplemental Table 1 Consumption, macro- and micro-nutritional composition, degree of processing, nutrient profile, satiety and glycemic potential of ready-to-eat foods
	Consumption profile		Nutritional composition																															Functional and nutritional properties
Food characteristics	Consumption	Quantity consumed	Energy	Total proteins	Total lipids	Total carbohydrates	Fiber	Alcohol	Water	SFA	Calcium	Iron	Iodine	Magnesium	Potassium	Sodium	Copper	Zinc	Selenium	Retinol	Vitamin B2	Total vitamin B3/PP	Vitamin B6	Vitamin B9	Vitamin B12	Vitamin C	Vitamin D	Vitamin E	a-linolenic acid	DHA	Linoleic acid	Arachidonic acid	Added simple carbohydrates	NOVA technological groups	Fullness Factor	GGE	GI	NDS	LIM
Units	%	g/day	kcal/100 g	g/100 g	g/100 g	g/100 g	g/100 g	g/100 g	g/100 g	g/100 g	mg/100 g	mg/100 g	mg/100 g	mg/100 g	mg/100 g	mg/100 g	mg/100 g	mg/100 g	mg/100 g	mg/100 g	mg/100 g	mg/100 g	mg/100 g	mg/100 g	mg/100 g	mg/100 g	mg/100 g	mg/100 g	g/100 g	g/100 g	g/100 g	g/100 g	g/100 g			g/100 g
Fig	7.555	51.800	56.000	1.020	0.300	12.300	2.100	0.000	81.200	0.054	38.700	0.335	1.500	16.000	216.000	2.000	0.060	0.225	0.200	0.000	0.040	0.400	0.096	7.330	0.000	2.000	0.000	0.695	0.000	0.000	0.127	0.000	0.000	1	3.16			4.91	0.11
Mango	8.227	27.943	56.300	0.600	0.320	12.500	2.100	0.000	82.100	0.070	12.000	0.350	0.900	11.000	147.000	2.000	0.110	0.070	0.600	0.000	0.050	0.540	0.130	38.700	0.000	32.400	0.000	1.080	0.043	0.000	0.016	0.000	0.000	1	3.13	7	51	9.16	0.13
Raspberry	12.362	32.255	36.200	1.300	1.000	5.500	6.100	0.000	84.700	0.019	20.000	0.700	0.500	22.000	204.000	2.000	0.110	0.360	0.200	0.000	0.196	0.530	0.070	35.000	0.000	25.000	0.000	0.700	0.126	0.000	0.249	0.000	0.000	1	4.20			15.48	0.06
Plum	14.881	53.367	44.100	0.800	0.280	9.600	2.300	0.000	81.900	0.044	5.300	0.305	2.700	7.330	243.000	0.750	0.080	0.100	0.140	0.000	0.040	0.600	0.050	10.000	0.000	5.400	0.000	0.550	0.039	0.000	0.078	0.000	0.000	1	3.61	5	39	6.25	0.08
Pineapple	15.038	34.423	47.300	0.540	0.240	10.200	1.600	0.000	85.900	0.010	20.900	0.240	1.200	20.700	160.000	1.100	0.060	0.070	0.330	0.000	0.020	0.330	0.090	13.500	0.000	21.300	0.000	0.100	0.034	0.000	0.046	0.000	0.000	1	3.45	8	66	6.56	0.03
grapes	15.102	71.851	66.300	0.590	0.430	15.550	1.100	0.000	81.900	0.140	8.150	0.319	0.450	8.540	190.000	1.535	0.097	0.053	2.400	0.000	0.023	0.275	0.083	13.450	0.000	6.200	0.000	0.550	0.043	0.000	0.085	0.000	0.000	1	2.86	7	46	3.88	0.23
Fruit salad	17.556	72.022	48.257	0.664	0.270	10.393	1.653	0.000	85.314	0.033	15.625	0.273	1.380	14.748	193.308	1.564	0.075	0.077	0.573	0.000	0.034	0.351	0.140	28.737	0.000	31.924	0.000	0.425	0.035	0.000	0.077	0.000	0.000	1	3.42	7	55	8.38	0.07
Nectarine	17.628	77.439	41.250	1.060	0.320	8.100	1.600	0.000	88.000	0.014	3.100	0.173	1.500	8.870	187.000	0.820	0.075	0.100	0.040	0.000	0.035	0.861	0.024	12.500	0.000	15.300	0.000	1.060	0.001	0.000	0.074	0.000	0.000	1	3.76			7.84	0.03
Applesauce without added sugar	19.066	44.932	45.428	0.290	0.148	10.735	1.140	0.000	86.796	0.013	8.735	0.312	0.275	5.357	96.633	2.065	0.043	0.053	0.323	0.000	0.037	0.146	0.030	3.878	0.000	1.955	0.000	0.168	0.009	0.000	0.029	0.000	0.000	1	3.52			2.92	0.05
Apricot	20.396	61.475	45.200	0.950	0.445	9.350	2.500	0.000	86.400	0.078	12.200	0.545	0.650	12.350	144.000	7.990	0.068	0.100	0.330	0.000	0.040	0.500	0.075	10.000	0.000	9.650	0.000	1.225	0.000	0.000	0.075	0.000	0.000	1	3.57	5	57	8.94	0.23
Grapefruit	21.577	17.816	38.900	0.800	0.100	6.200	1.300	0.000	89.800	0.029	23.300	0.082	0.465	9.150	167.000	2.650	0.032	0.061	0.100	0.000	0.029	0.241	0.046	17.000	0.000	42.100	0.000	0.213	0.009	0.000	0.034	0.000	0.000	1	3.87	1	25	9.58	0.08
Cherry	29.804	87.884	63.630	1.200	0.270	14.100	1.700	0.000	81.100	0.050	11.000	0.300	0.300	9.900	215.000	2.000	0.060	0.070	0.050	0.000	0.030	0.400	0.050	15.000	0.000	9.000	0.000	0.200	0.034	0.000	0.036	0.000	0.000	1	2.96	3	22	3.77	0.10
Lemon	30.319	17.344	18.900	0.800	0.450	2.900	2.000	0.000	90.000	0.060	16.500	0.380	0.900	8.900	146.000	1.100	0.030	0.070	1.390	0.000	0.020	0.170	0.070	18.000	0.000	51.700	0.000	0.520	0.038	0.000	0.092	0.000	0.000	1	5.00			22.52	0.11
Peach	35.370	93.755	48.800	0.700	0.090	11.300	2.000	0.000	88.000	0.010	6.100	0.270	0.900	9.400	210.000	2.200	0.070	0.140	0.110	0.000	0.040	0.990	0.010	3.000	0.000	6.600	0.000	0.700	0.001	0.000	0.004	0.000	0.000	1	3.40	3	42	4.92	0.05
Kiwi	36.658	78.941	49.700	1.140	0.610	8.800	2.400	0.000	84.100	0.030	31.200	0.340	1.100	11.700	267.000	1.650	0.170	0.090	0.250	0.000	0.030	0.380	0.110	34.500	0.000	83.200	0.000	0.990	0.047	0.000	0.264	0.000	0.000	1	3.39	5	53	13.50	0.07
Melon	40.693	127.203	34.100	0.830	0.140	7.300	0.900	0.000	90.100	0.030	6.240	0.200	0.600	14.900	237.000	5.660	0.030	0.190	0.200	0.000	0.020	0.510	0.080	33.250	0.000	23.100	0.000	0.110	0.025	0.000	0.019	0.000	0.000	1	4.18	4	65	10.75	0.13
Pear	41.293	83.572	45.100	0.385	0.220	10.400	3.030	0.000	85.100	0.026	7.640	0.103	1.000	7.820	130.000	1.230	0.072	0.102	0.150	0.000	0.035	0.192	0.066	6.150	0.000	5.300	0.000	0.465	0.021	0.000	0.064	0.000	0.000	1	3.55	5	38	4.55	0.06
Strawberry	41.322	89.428	26.700	0.700	0.300	5.300	2.000	0.000	91.300	0.015	13.200	0.500	1.700	12.100	153.000	1.100	0.040	0.060	0.100	0.000	0.022	0.390	0.050	69.000	0.000	57.000	0.000	0.140	0.065	0.000	0.090	0.000	0.000	1	4.84	3	40	19.00	0.04
Orange	43.254	90.370	39.500	0.957	0.260	8.320	1.820	0.000	87.100	0.054	39.000	0.106	0.961	12.400	151.000	3.400	0.040	0.073	0.600	0.000	0.041	0.261	0.081	38.700	0.000	39.700	0.000	0.395	0.029	0.000	0.072	0.000	0.000	1	3.85	4	42	11.50	0.13
Clementine/mandarin	46.960	69.652	44.600	0.700	0.200	10.000	1.400	0.000	85.600	0.000	18.700	0.350	0.400	7.600	145.000	3.170	0.040	0.590	2.200	0.000	0.040	0.300	0.040	26.400	0.000	41.000	0.000	0.550	0.000	0.000	0.000	0.000	0.000	1	3.58			10.36	0.04
Banana	49.578	64.280	88.100	0.900	0.220	20.200	1.000	0.000	75.200	0.050	4.800	0.320	2.900	29.700	413.000	0.700	0.110	0.160	0.300	0.000	0.070	0.610	0.470	27.000	0.000	11.700	0.000	0.290	0.026	0.000	0.044	0.000	0.000	1	2.48	13	52	5.18	0.09
Apple	74.603	199.463	47.900	0.310	0.162	11.300	1.950	0.000	85.300	0.039	2.500	0.123	0.562	6.080	120.000	1.600	0.040	0.040	1.380	0.000	0.025	0.100	0.068	3.860	0.000	6.450	0.000	0.590	0.023	0.000	0.087	0.000	0.000	1	3.42	4	38	4.03	0.08
Exotic fruits and dried seeds	6.539	9.693	487.889	10.945	36.524	28.846	7.374	0.000	9.710	11.658	85.410	3.650	4.068	154.540	762.500	13.166	1.074	2.343	11.598	0.000	0.200	1.907	0.447	67.875	0.000	1.825	0.000	12.798	0.058	0.000	7.016	0.000	0.000	1	1.61			5.02	17.85
Dried fruit (dates, figs, prunes and apricots)	9.107	11.013	238.400	2.650	0.439	49.510	7.857	0.000	25.750	0.141	52.800	2.750	2.380	51.400	771.500	15.040	0.431	0.494	0.700	0.000	0.118	1.630	0.204	22.500	0.000	2.592	0.000	1.708	0.022	0.000	0.124	0.000	0.000	1	1.95	35	58	3.76	0.43
Brussels sprouts	5.623	37.961	23.100	1.900	0.300	3.200	1.600	0.000	89.000	0.060	36.000	1.200	1.000	20.000	317.000	21.000	0.060	0.320	1.500	0.000	0.080	0.610	0.180	85.000	0.000	61.000	0.000	0.900	0.105	0.000	0.050	0.001	0.000	1	5.00			36.37	0.39
Raw celeriac	5.723	22.244	15.000	1.200	0.300	1.940	3.200	0.000	88.100	0.073	38.800	0.419	2.830	13.100	348.000	269.000	0.060	0.290	0.900	0.000	0.035	0.555	0.125	51.000	0.000	8.000	0.000	0.100	0.017	0.000	0.146	0.000	0.000	1	5.00			26.86	3.90
Celery branch	5.766	26.416	14.400	0.830	0.160	2.400	1.600	0.000	94.700	0.040	53.300	0.420	0.300	9.000	284.000	83.100	0.060	0.080	1.000	0.000	0.050	0.320	0.090	16.000	0.000	5.050	0.000	0.280	0.000	0.000	0.080	0.000	0.000	1	5.00			22.46	1.23
Sweet corn	5.952	19.575	104.000	2.800	0.950	21.000	3.000	0.000	72.400	0.150	4.300	0.500	0.700	19.000	165.000	247.000	0.030	0.500	0.270	0.000	0.070	1.300	0.120	29.700	0.000	4.920	0.000	0.370	0.008	0.000	0.392	0.000	0.000	1	2.39	11	54	3.71	3.71
Julienne vegetables	6.167	38.071	62.601	0.858	5.174	3.152	1.783	0.000	87.953	0.795	38.776	0.382	0.883	12.246	201.830	126.811	0.078	0.359	1.020	0.000	0.036	0.381	0.095	35.887	0.000	4.668	0.000	0.947	0.052	0.000	0.367	0.000	0.000	1	2.97			8.10	2.99
Beans with butter	6.281	33.028	20.600	1.500	0.200	3.200	1.900	0.000	92.100	0.044	38.000	1.050	0.400	15.100	102.000	253.000	0.039	0.240	0.420	0.000	0.050	0.250	0.038	66.000	0.000	4.900	0.000	0.290	0.063	0.000	0.039	0.000	0.000	1	5.00			16.92	3.63
Cooked kale	6.510	36.806	21.500	1.360	0.450	3.000	2.400	0.000	94.700	0.006	58.500	0.140	2.000	12.500	92.600	114.000	0.070	0.176	0.400	0.000	0.030	0.140	0.130	29.000	0.000	20.000	0.000	0.200	0.017	0.000	0.016	0.000	0.000	1	5.00			16.09	1.62
Baked celeriac	6.796	29.651	28.000	0.960	0.190	2.800	2.000	0.000	96.000	0.050	26.000	0.430	1.000	12.000	173.000	61.000	0.040	0.200	0.400	0.000	0.040	0.430	0.100	20.000	0.000	4.800	0.000	0.400	0.000	0.000	0.090	0.000	0.000	1	4.72			9.27	0.94
Raw pumpkin	7.040	41.840	13.700	0.600	0.100	2.600	1.600	0.000	94.500	0.020	25.900	1.000	0.700	5.900	223.000	9.300	0.070	0.140	0.200	0.000	0.040	0.370	0.044	29.200	0.000	0.700	0.000	0.300	0.005	0.000	0.005	0.000	0.000	1	5.00			41.93	0.16
Mushrooms	7.369	28.757	23.300	2.900	0.500	0.400	1.900	0.000	93.100	0.100	7.500	0.900	1.000	9.000	318.000	11.200	0.170	0.600	3.400	0.000	0.400	3.610	0.100	26.300	0.000	5.000	0.200	0.065	0.001	0.000	0.160	0.000	0.000	1	5.00			26.29	0.31
Mixed vegetables	8.242	42.504	42.860	2.510	0.334	7.454	4.024	0.000	84.580	0.046	40.980	0.874	1.552	16.820	183.480	89.722	0.085	0.512	0.720	0.000	0.088	0.756	0.098	35.200	0.000	6.880	0.000	0.272	0.041	0.000	0.059	0.000	0.000	1	3.79			13.40	1.33
Cooked cabbage	8.499	38.990	14.300	1.200	0.300	1.700	2.710	0.000	93.500	0.040	31.000	0.200	0.900	8.000	99.000	8.000	0.010	0.200	0.300	0.000	0.040	0.260	0.100	28.000	0.000	20.000	0.000	0.200	0.144	0.000	0.052	0.000	0.000	1	5.00			25.94	0.17
Vegetable puree	8.957	46.222	75.400	1.404	4.110	8.192	1.766	0.000	83.319	2.602	25.237	0.473	2.624	18.689	358.003	176.459	0.140	0.398	1.093	30.410	0.041	0.893	0.171	28.885	0.012	13.264	0.039	0.680	0.038	0.000	0.156	0.000	0.000	1	2.71			8.32	6.43
Celery remoulade	9.730	27.642	146.445	1.685	14.786	1.629	2.649	0.000	74.178	2.231	39.964	0.653	7.681	13.223	292.112	487.575	0.060	0.368	4.143	22.464	0.053	0.458	0.109	50.178	0.220	8.387	0.169	4.955	0.125	0.008	4.811	0.018	0.008	1	1.96			6.78	10.25
Chard	10.145	48.276	16.400	1.880	0.080	2.000	2.100	0.000	92.600	0.010	66.900	2.260	0.400	22.900	549.000	208.000	0.110	0.320	0.900	0.000	0.080	0.360	0.080	9.500	0.000	18.000	0.000	1.890	0.002	0.000	0.018	0.000	0.000	1	5.00			68.41	2.95
Turnip	10.288	30.636	16.400	0.710	0.080	3.200	2.000	0.000	93.400	0.008	47.900	0.180	0.500	6.780	177.000	44.300	0.050	0.070	0.600	0.000	0.020	0.290	0.060	8.670	0.000	10.800	0.000	0.010	0.030	0.000	0.009	0.000	0.000	1	5.00			13.40	0.64
Cooked fennel	12.148	49.910	8.620	1.130	0.100	0.800	2.000	0.000	94.400	0.030	43.700	0.200	10.000	10.800	270.000	125.000	0.129	0.164	1.000	0.000	0.020	0.360	0.116	24.900	0.000	1.600	0.000	0.320	0.035	0.000	0.035	0.000	0.000	1	5.00			36.29	1.81
Cooked pepper	14.551	25.850	26.500	0.920	0.400	4.800	1.200	0.000	91.900	0.046	9.000	0.460	1.000	10.000	166.000	2.000	0.070	0.120	0.100	0.000	0.030	0.480	0.230	16.000	0.000	74.400	0.000	0.800	0.050	0.000	0.088	0.000	0.000	1	4.87			26.15	0.10
Artichoke	14.952	39.674	18.000	3.100	0.180	1.000	5.400	0.000	84.600	0.040	49.500	0.890	0.500	30.800	342.000	51.600	0.080	0.260	0.200	0.000	0.040	1.000	0.060	50.500	0.000	5.500	0.000	0.190	0.009	0.000	0.051	0.000	0.000	1	5.00			26.25	0.79
Eggplant	15.868	39.136	18.700	0.830	0.200	3.400	2.500	0.000	91.800	0.030	20.100	0.250	1.000	15.000	123.000	5.140	0.050	0.090	0.100	0.000	0.020	0.600	0.080	14.000	0.000	1.300	0.000	0.030	0.018	0.000	0.092	0.000	0.000	1	5.00			12.11	0.12
Beet	16.125	25.041	41.700	2.000	0.140	8.100	2.000	0.000	88.000	0.020	17.000	0.590	0.300	16.200	232.000	26.200	0.060	0.280	0.300	0.000	0.020	0.210	0.050	38.000	0.000	4.300	0.000	0.150	0.004	0.000	0.045	0.000	0.000	1	3.78	7	64	6.47	0.40
Green salads	16.383	18.382	12.950	1.100	0.220	1.800	1.300	0.000	95.150	0.040	48.700	0.825	1.195	16.650	293.000	15.550	0.050	0.210	0.250	0.000	0.048	0.373	0.055	76.000	0.000	13.500	0.000	0.420	0.050	0.000	0.031	0.000	0.000	1	5.00			56.22	0.28
Asparagus	17.127	53.954	16.800	2.400	0.220	1.300	2.000	0.000	92.600	0.050	20.900	0.910	0.500	8.870	224.000	14.000	0.100	0.330	2.800	0.000	0.130	1.080	0.070	101.000	0.000	7.700	0.000	0.380	0.025	0.000	0.065	0.000	0.000	1	5.00			37.88	0.27
Raw onion	18.429	14.954	30.700	1.350	0.200	5.700	1.800	0.000	88.200	0.040	32.800	0.410	2.000	9.060	171.000	2.250	0.060	0.170	0.220	0.000	0.030	0.160	0.130	24.000	0.000	7.420	0.000	0.200	0.008	0.000	0.053	0.000	0.000	1	4.48			8.89	0.09
Black radish	20.547	26.441	34.450	1.780	0.200	6.385	1.150	0.000	86.000	0.060	67.800	1.002	1.000	27.500	398.500	9.445	0.029	0.176	0.350	0.000	0.072	0.451	0.124	43.750	0.000	65.500	0.000	0.000	0.032	0.000	0.060	0.000	0.000	1	4.21			18.63	0.22
Leek	21.148	30.399	20.200	0.800	0.200	3.800	2.400	0.000	91.500	0.027	40.200	0.500	0.200	7.400	87.000	15.800	0.070	0.160	0.800	0.000	0.020	0.200	0.110	69.000	0.000	5.600	0.000	0.780	0.055	0.000	0.037	0.000	0.000	1	5.00			20.16	0.26
Baked endive	21.920	54.400	10.800	1.500	0.350	0.400	3.000	0.000	94.400	0.080	45.900	0.900	0.100	13.200	228.000	23.200	0.100	0.170	2.200	0.000	0.040	0.200	0.000	22.500	0.000	2.850	0.000	0.000	0.022	0.000	0.130	0.000	0.000	1	5.00			40.54	0.45
Cooked peas	22.550	35.786	70.700	5.200	0.310	11.800	5.500	0.000	77.800	0.050	41.900	1.400	1.500	20.200	220.000	1.310	0.130	0.510	0.900	0.000	0.130	1.760	0.140	61.000	0.000	15.500	0.000	0.100	0.026	0.000	0.113	0.000	0.000	1	3.10	2	48	11.03	0.09
Cauliflower	23.022	53.691	17.900	1.840	0.450	1.610	2.200	0.000	93.100	0.070	26.200	0.330	0.200	7.700	142.000	41.600	0.060	0.180	2.200	0.000	0.050	0.410	0.170	105.000	0.000	35.600	0.000	0.080	0.169	0.000	0.050	0.000	0.000	1	5.00			31.29	0.69
Beet salad	23.179	28.937	91.512	1.931	5.983	7.375	1.894	0.000	82.617	0.804	18.087	0.639	0.562	16.785	217.292	141.258	0.059	0.279	0.738	0.000	0.019	0.199	0.047	34.519	0.000	3.912	0.000	2.091	0.055	0.000	2.026	0.000	0.000	1	2.48			4.85	3.21
Spinach	23.423	48.590	22.600	1.400	0.290	3.600	3.000	0.000	89.200	0.040	196.000	3.570	2.000	90.600	466.000	61.300	0.230	0.720	1.500	0.000	0.230	0.490	0.240	153.000	0.000	8.900	0.000	1.330	0.100	0.000	0.020	0.000	0.000	1	5.00			91.05	0.92
Broccoli	23.437	54.009	24.270	2.100	0.510	2.820	2.230	0.000	91.900	0.124	55.800	1.000	2.000	11.500	148.000	53.000	0.198	0.400	2.200	0.000	0.080	0.100	0.230	102.000	0.000	37.300	0.000	1.030	0.136	0.000	0.058	0.000	0.000	1	5.00			31.10	0.93
Vegetable Salad	25.669	63.504	85.295	1.027	6.411	5.665	1.599	0.000	84.244	0.973	19.627	0.479	1.777	14.177	214.698	285.242	0.042	0.206	0.367	0.000	0.035	0.551	0.078	28.245	0.000	5.874	0.000	1.028	0.054	0.000	0.487	0.000	0.000	1	2.52			7.43	5.49
Baked tomato	26.127	36.602	30.200	1.410	0.500	5.000	2.800	0.000	89.500	0.069	32.700	1.130	2.200	24.300	799.000	242.000	0.218	0.280	0.600	0.000	0.063	1.390	0.162	72.000	0.000	9.530	0.000	2.300	0.009	0.000	0.196	0.000	0.000	1	4.54			29.81	3.52
Avocado	27.042	37.985	137.000	1.900	13.900	0.800	5.600	0.000	76.100	1.830	10.700	0.770	1.200	27.100	420.000	0.950	0.280	0.480	0.400	0.000	0.130	1.370	0.360	79.300	0.000	11.300	0.000	1.340	0.090	0.000	1.364	0.000	0.000	1	2.13			5.97	2.79
Raw carrots	28.044	32.995	32.000	0.800	0.260	6.025	2.047	0.000	89.400	0.059	26.367	0.281	1.480	11.900	227.192	93.800	0.038	0.217	0.828	0.000	0.042	0.907	0.123	47.119	0.000	3.642	0.000	0.560	0.022	0.000	0.155	0.000	0.000	1	4.35	3	47	42.33	1.41
Cucumber	30.104	39.992	9.800	0.590	0.160	1.500	0.700	0.000	96.900	0.013	14.000	0.195	4.000	12.000	145.000	2.000	0.050	0.150	0.100	0.000	0.025	0.037	0.051	14.000	0.000	3.200	0.000	0.100	0.000	0.000	0.003	0.000	0.000	1	5.00			17.10	0.05
Cooked onion	30.419	10.481	24.500	1.180	0.190	4.500	1.400	0.000	89.500	0.030	24.000	0.370	1.000	11.500	133.000	3.500	0.050	0.200	0.300	0.000	0.030	0.130	0.090	23.000	0.000	4.730	0.000	0.130	0.004	0.000	0.066	0.000	0.000	1	5.00			9.37	0.09
Raw endive	31.836	21.098	11.300	1.000	0.100	1.600	2.100	0.000	95.000	0.020	26.100	0.190	0.100	8.660	191.000	3.700	0.060	0.150	0.200	0.000	0.030	0.230	0.050	56.000	0.000	3.400	0.000	0.100	0.006	0.000	0.034	0.000	0.000	1	5.00			24.38	0.08
Zucchini	37.416	50.038	16.000	1.140	0.290	2.210	1.350	0.000	94.100	0.072	20.300	0.350	1.000	21.800	368.000	10.400	0.151	0.320	1.000	0.000	0.041	0.428	0.050	39.500	0.000	6.950	0.000	0.280	0.018	0.000	0.133	0.000	0.000	1	5.00			23.33	0.26
Raw tomatoes	38.367	47.212	19.550	0.855	0.365	3.050	1.400	0.000	93.150	0.050	9.955	0.400	1.850	10.550	289.500	8.050	0.048	0.162	0.200	0.000	0.034	0.816	0.111	19.100	0.000	22.350	0.000	1.115	0.006	0.000	0.142	0.000	0.000	1	5.00			25.52	0.19
Baked green beans	53.985	63.505	25.500	1.340	0.280	4.400	4.100	0.000	89.300	0.060	47.600	0.940	0.400	11.700	200.000	3.000	0.060	0.240	0.400	0.000	0.080	0.460	0.060	39.000	0.000	8.570	0.000	0.200	0.089	0.000	0.056	0.000	0.000	1	5.00			18.21	0.13
Zucchini Soup	10.974	103.087	24.314	0.575	1.969	1.075	0.548	0.000	95.145	1.353	16.999	0.191	1.715	8.878	134.287	84.874	0.064	0.133	1.736	12.720	0.025	0.157	0.022	15.214	0.007	2.524	0.006	0.128	0.016	0.000	0.074	0.002	0.000	1	5.00			7.91	3.25
Pumpkin soup	14.537	102.507	31.559	0.750	1.665	3.405	1.021	0.000	91.580	0.998	17.993	0.598	279.161	5.561	123.767	313.884	0.045	0.101	0.342	11.988	0.022	0.314	0.030	25.645	0.046	0.419	0.020	0.191	0.010	0.000	0.118	0.000	0.000	1	4.38			37.26	5.94
Leek and potatoes soup	14.752	107.776	47.846	0.610	3.395	3.712	1.112	0.000	90.447	0.921	24.281	0.463	1.359	6.800	92.803	49.599	0.058	0.115	1.786	5.300	0.017	0.261	0.081	21.231	0.003	3.620	0.003	1.110	0.042	0.000	0.897	0.001	0.000	1	3.43			6.70	2.09
Vegetable soup (homemade)	59.808	263.419	26.940	0.739	1.054	3.622	1.286	0.000	92.373	0.686	26.011	0.288	1.533	9.407	159.243	109.544	0.072	0.214	1.399	6.360	0.025	0.369	0.081	24.129	0.004	4.678	0.003	0.343	0.020	0.000	0.052	0.001	0.000	1	4.81			12.29	2.58
Dehydrated and reconstituted vegetable broth	5.265	73.482	4.000	0.150	0.200	0.300	0.000	0.000	98.000	0.045	1.000	0.100	425.000	2.000	8.000	295.000	0.000	0.000	0.000	0.000	0.010	0.100	0.000	1.000	0.000	0.000	0.000	0.000	0.000	0.000	0.033	0.000	0.000	1	5.00			322.71	4.23
Lean fish	7.483	38.471	102.000	20.100	1.020	0.000	0.000	0.000	76.900	0.210	62.000	0.400	30.900	27.000	360.000	105.000	0.026	0.500	22.100	2.000	0.080	1.700	0.190	8.000	2.100	0.000	0.860	0.480	0.002	0.211	0.012	0.016	0.000	1	3.26			19.92	1.80
Fatty fish	9.30	18.82	196.00	24.30	11.20	0.00	0.00	0.00	64.50	3.07	15.00	1.43	32.00	64.00	357.00	141.13	0.09	0.77	38.00	12.00	0.29	7.00	0.46	4.00	12.00	0.00	7.50	1.28	0.08	0.77	0.13	0.05	0.000	1	2.86			36.94	6.64
Coquille Saint-Jacques, nut	6.138	21.377	83.300	17.450	1.005	1.128	0.000	0.000	79.000	0.144	93.950	0.870	35.300	47.700	390.000	164.000	0.052	2.255	14.700	8.500	0.094	1.935	0.117	14.500	3.495	0.000	0.000	1.105	0.023	0.113	0.005	0.021	0.000	1	3.38			23.14	2.53
Oyster	10.617	31.270	42.100	6.360	1.500	0.795	0.000	0.000	87.200	0.337	74.600	2.250	87.900	81.900	215.000	580.000	1.460	21.300	44.000	14.200	0.153	7.290	0.095	3.000	24.100	5.000	0.500	1.210	0.023	0.120	0.012	0.018	0.000	1	3.98			176.54	8.69
Mussel	11.833	30.475	115.000	19.000	2.990	3.100	0.000	0.000	70.300	0.380	78.600	10.200	352.000	64.400	247.000	409.000	0.170	1.820	21.200	84.000	0.200	1.600	0.090	42.000	10.200	4.000	0.000	3.500	0.012	0.150	0.025	0.042	0.000	1	3.07			43.10	6.34
Pink shrimp	19.116	17.841	96.300	21.300	1.100	0.300	0.000	0.000	74.900	0.230	83.200	1.680	37.000	26.900	103.000	651.000	0.460	1.310	12.500	10.000	0.038	2.250	0.112	12.500	1.350	0.750	0.500	2.750	0.010	0.144	0.020	0.070	0.000	1	3.39			18.78	9.52
Veal	6.567	28.565	151.000	26.300	3.960	0.100	0.000	0.000	65.000	3.240	10.800	1.000	6.000	27.000	366.000	100.000	0.100	3.210	8.100	0.000	0.270	7.930	0.400	13.000	1.050	0.000	0.500	0.260	0.009	0.000	0.326	0.023	0.000	1	3.18			8.74	6.32
Beef, steak, roast beef and entrecote	8.070	34.338	170.300	25.500	8.700	0.000	0.000	0.000	64.000	2.700	8.200	2.710	6.000	27.000	384.000	74.000	0.096	5.400	10.200	0.000	0.220	5.200	0.370	14.300	2.000	0.000	0.000	0.210	0.035	0.000	0.212	0.035	0.000	1	3.03			8.81	5.13
Cooked lamb/mutton meat	8.714	22.596	230.000	22.600	15.500	0.000	0.000	0.000	60.600	7.370	19.700	2.400	5.000	20.100	333.000	120.000	0.077	3.020	10.400	0.000	0.210	5.000	0.200	3.000	1.700	0.000	0.000	0.160	0.042	0.000	0.566	0.090	0.000	1	2.65			5.48	12.86
Lean pork	11.790	30.053	158.000	27.500	6.260	0.000	0.000	0.000	65.200	1.920	9.000	1.140	5.000	31.300	430.000	65.000	0.056	2.590	15.600	0.000	0.386	5.650	0.400	20.000	0.713	0.000	0.000	0.060	0.022	0.000	0.350	0.054	0.000	1	3.20			9.56	3.83
Rabbit meat	13.965	29.273	167.000	20.500	9.200	0.500	0.000	0.000	68.200	3.420	31.900	0.900	3.000	31.500	340.000	63.200	0.060	1.790	30.600	0.300	0.210	9.000	0.130	2.100	2.200	0.000	0.200	1.220	0.430	0.000	1.643	0.000	0.000	1	2.80			10.18	6.07
Cooked pork meat	15.009	33.276	246.500	27.500	15.150	0.000	0.000	0.000	56.100	5.535	19.350	1.120	5.000	23.900	345.000	85.500	0.067	2.930	14.900	0.835	0.270	4.950	0.335	5.000	0.800	0.100	0.000	0.065	0.078	0.003	1.255	0.053	0.000	1	2.85			5.57	9.59
Roasted poultry meat	9.336	32.733	190.000	25.500	9.785	0.000	0.000	0.000	64.585	2.845	12.500	1.305	5.000	22.500	235.500	84.500	0.078	2.480	19.050	25.500	0.201	6.358	0.355	7.665	0.330	0.000	0.270	0.260	0.105	0.048	1.650	0.100	0.000	1	2.94			7.40	5.50
Chicken, white	22.600	34.444	124.000	22.200	3.930	0.000	0.000	0.000	73.000	1.010	13.700	0.740	5.000	26.000	287.000	51.000	0.040	0.860	25.000	4.670	0.090	10.700	0.540	8.000	0.350	17.000	0.000	0.280	0.035	0.026	0.642	0.069	0.000	1	3.15			11.31	2.25
White Ham	21.262	22.448	119.000	20.450	3.865	0.545	0.000	0.000	73.250	1.230	8.600	0.800	6.000	21.750	312.500	781.500	0.095	2.680	10.000	0.000	0.200	5.775	0.363	1.150	0.300	7.950	0.300	0.170	0.021	0.000	0.324	0.029	0.000	1	3.11			10.56	12.88
Veal liver	5.494	30.832	142.000	25.000	3.960	1.570	0.000	0.000	67.700	0.000	9.000	5.050	5.000	28.300	450.000	89.000	20.100	13.200	22.000	10500.000	1.720	18.800	1.030	404.000	71.400	13.200	2.520	0.710	0.041	0.000	0.735	0.355	0.000	1	3.17			242.16	1.25
Scrambled egg	7.655	20.463	181.000	10.900	14.500	1.730	0.000	0.000	71.000	6.360	55.400	1.800	52.000	12.700	127.000	200.000	0.040	1.330	12.000	215.000	0.340	0.070	0.100	29.000	1.440	0.100	1.640	1.100	0.049	0.044	1.100	0.147	0.000	1	2.24			9.22	12.46
Boiled egg	13.650	26.718	148.000	12.300	10.600	0.800	0.000	0.000	74.600	3.270	69.900	1.640	38.800	11.200	126.000	117.000	0.050	1.050	13.000	168.000	0.510	0.060	0.120	120.000	1.110	0.000	1.700	1.050	0.047	0.042	1.053	0.141	0.000	1	2.49			11.39	6.60
Fried egg	30.047	27.807	186.000	12.000	15.000	0.830	0.000	0.000	69.100	4.210	57.000	1.990	45.000	10.400	136.000	180.000	0.050	0.860	14.800	193.000	0.390	0.060	0.130	49.000	1.320	0.000	1.900	1.640	0.087	0.078	1.949	0.261	0.000	1	2.27			10.23	8.92
Hard egg	33.739	22.195	148.000	12.300	10.600	0.800	0.000	0.000	74.600	3.270	69.900	1.640	38.800	11.200	126.000	117.000	0.050	1.050	13.000	168.000	0.510	0.060	0.120	75.000	1.110	0.000	1.700	1.050	0.047	0.042	1.052	0.141	0.000	1	2.49			10.97	6.60
Skimmed milk	11.704	261.575	31.200	3.280	0.090	4.320	0.000	0.000	91.000	0.050	113.000	0.050	12.700	10.600	173.000	41.800	0.003	0.410	0.800	0.500	0.160	0.090	0.020	2.800	0.270	1.300	0.000	0.000	0.001	0.000	0.004	0.000	0.000	1	4.53	1	32	9.80	0.66
Semi-skimmed milk	24.968	218.254	47.250	3.590	1.610	4.610	0.000	0.000	89.050	0.960	116.500	0.105	10.600	11.100	165.500	46.550	0.005	0.450	1.000	18.650	0.175	0.100	0.020	3.655	0.330	1.900	0.030	0.100	0.010	0.000	0.030	0.000	0.000	1	3.60	1	27	7.65	2.11
Plain goat milk yogurt	5.695	70.241	57.000	3.500	3.800	2.200	0.000	0.000	88.700	2.330	120.000	0.200	15.860	14.000	170.000	39.000	0.010	0.400	0.708	18.080	0.170	0.270	0.060	7.000	0.000	1.000	0.070	0.030	0.030	0.000	0.100	0.000	0.000	1	3.25			6.01	4.08
Plain sheep milk yogurt	5.967	62.857	109.500	4.900	7.500	5.600	0.000	0.000	80.900	4.900	150.000	0.000	20.000	16.000	190.000	150.000	0.000	0.500	1.000	86.000	0.330	0.200	0.080	5.000	0.200	4.000	0.180	0.730	0.020	0.000	0.060	0.000	0.000	1	2.42			5.39	9.54
Bewed yogurt (0% fat)	6.181	94.341	42.000	4.400	0.070	5.100	0.000	0.000	88.600	0.045	143.000	0.070	19.500	14.000	180.000	61.000	0.010	0.450	1.300	1.000	0.240	0.260	0.065	28.000	0.290	0.500	0.010	0.010	0.001	0.000	0.001	0.001	0.000	1	3.88			10.34	0.93
Plain stirred yoghurt	10.531	86.244	72.000	4.700	3.400	5.600	0.000	0.000	85.600	2.150	160.000	0.100	15.000	15.500	220.000	68.000	0.009	0.420	1.400	30.000	0.200	0.150	0.050	22.000	0.200	0.200	0.100	0.080	0.020	0.000	0.048	0.006	0.000	1	2.94			6.25	4.22
Yogurt Nature whole milk	15.224	69.741	62.200	4.040	3.940	2.630	0.000	0.000	87.600	2.000	138.000	0.100	18.800	12.000	180.000	51.600	0.009	0.441	1.400	29.500	0.200	0.165	0.078	20.000	0.200	0.200	0.040	0.065	0.024	0.000	0.060	0.000	0.000	1	3.13			7.07	3.76
Yogurt 0% fat	16.283	122.584	42.000	4.400	0.070	5.100	0.000	0.000	88.600	0.045	143.000	0.070	19.500	14.000	180.000	61.000	0.010	0.450	1.300	1.000	0.240	0.260	0.065	28.000	0.290	0.500	0.010	0.010	0.001	0.000	0.001	0.001	0.000	1	3.88			10.34	0.93
Plain bifidus yogurt	17.241	123.188	66.900	3.900	3.140	5.000	0.000	0.000	87.400	2.000	137.000	0.070	18.000	12.300	172.000	48.800	0.004	0.450	1.200	27.000	0.210	0.150	0.050	22.000	0.230	0.000	0.000	0.300	0.058	0.000	0.114	0.013	0.000	1	3.01			6.63	3.72
Plain yogurt	45.500	132.068	49.300	4.300	1.100	4.800	0.000	0.000	88.200	0.700	150.000	0.100	20.000	13.000	212.000	60.000	0.010	0.360	3.200	10.000	0.180	0.100	0.040	2.000	0.000	0.000	0.000	0.030	0.000	0.000	0.000	0.000	0.000	1	3.56	3	36	7.03	1.91
Soy milk	5.022	155.627	43.200	2.900	2.040	3.310	1.000	0.000	91.300	0.275	15.700	0.414	0.700	16.400	126.000	22.300	0.108	0.231	7.400	83.000	0.320	0.400	0.080	19.000	0.600	0.000	0.180	0.110	0.131	0.000	0.829	0.000	0.000	1	3.75	2	44	15.60	0.73
Plain soy yogurt	6.067	100.165	48.900	4.300	2.680	1.900	0.000	0.000	90.100	0.410	31.400	0.700	5.000	18.200	63.000	40.000	0.150	0.290	2.200	0.000	0.020	0.100	0.040	26.200	0.000	0.000	0.000	1.820	0.135	0.000	1.045	0.000	0.000	1	3.57			8.20	1.18
Cooked flageolet beans	6.410	33.545	69.900	4.070	0.790	11.628	7.120	0.000	74.900	0.066	45.400	1.560	2.860	30.000	268.000	347.000	0.150	0.680	1.000	0.000	0.160	0.790	0.050	24.000	0.000	3.600	0.000	0.370	0.083	0.000	0.037	0.000	0.000	1	3.18			8.17	4.99
Cooked white beans	9.801	40.197	102.520	8.410	0.320	16.500	6.300	0.000	67.700	0.090	39.300	2.700	3.000	25.500	480.000	6.000	0.159	0.659	2.200	0.000	0.046	0.140	0.090	81.000	0.000	0.000	0.000	0.145	0.073	0.000	0.073	0.000	0.000	1	2.82	6	38	6.92	0.22
Cooked lentils	16.912	45.140	107.000	8.200	0.500	17.500	5.000	0.000	69.000	0.070	27.200	3.070	3.000	25.400	309.000	3.800	0.240	1.030	2.800	0.000	0.060	0.660	0.160	56.800	0.000	1.750	0.000	0.260	0.049	0.000	0.180	0.000	0.000	1	2.69	3	26	6.85	0.16
Potato salad (homemade)	6.732	37.193	139.046	1.774	7.567	15.908	1.732	0.000	71.097	1.045	8.004	0.408	2.843	21.132	342.941	157.284	0.173	0.290	1.955	0.000	0.019	1.254	0.269	22.687	0.000	11.614	0.000	2.608	0.066	0.000	2.587	0.000	0.000	1	2.02			4.85	3.80
Mashed potatoes	14.358	44.529	104.897	2.182	3.932	15.192	1.530	0.000	75.549	2.656	24.766	0.352	4.159	20.240	330.130	146.677	0.156	0.328	1.511	33.381	0.046	1.156	0.241	8.488	0.043	10.516	0.058	0.146	0.023	0.000	0.127	0.000	0.000	1	2.33	11	74	4.62	6.09
Baked potato	18.257	53.030	89.100	1.960	0.100	20.100	1.500	0.000	75.400	0.026	9.480	0.350	3.000	21.600	391.000	1.430	0.094	0.237	0.300	0.000	0.021	1.400	0.301	9.000	0.000	12.800	0.000	0.040	0.010	0.000	0.032	0.000	0.000	1	2.52	11	56	4.66	0.06
Boiled potato	41.351	67.682	79.900	1.860	0.100	17.900	1.900	0.000	77.500	0.026	7.670	0.473	0.800	12.000	333.000	2.230	0.089	0.174	0.300	0.000	0.026	1.380	0.256	10.700	0.000	11.100	0.000	0.050	0.010	0.000	0.033	0.000	0.000	1	2.66	10	56	4.78	0.07
Steam potatoes	42.524	67.794	81.600	1.870	0.100	18.300	1.800	0.000	77.000	0.030	5.000	0.310	3.000	22.000	379.000	1.500	0.190	0.300	1.600	0.000	0.020	1.440	0.300	10.000	0.000	13.000	0.000	0.040	0.009	0.000	0.030	0.000	0.000	1	2.63	12	65	5.57	0.07
Muesli	6.553	29.549	358.000	9.800	6.800	64.400	10.000	0.000	4.200	2.000	50.000	7.100	5.000	80.000	490.000	350.000	0.690	1.500	13.100	0.000	1.160	12.500	1.500	200.000	0.760	1.000	0.000	4.600	0.044	0.000	1.412	0.000	13.91	1	2.40	28	49	9.08	17.24
Cooked vermicelli	5.709	23.162	115.000	3.950	0.580	23.500	1.600	0.000	68.900	0.120	7.000	0.500	1.000	20.000	49.000	1.300	0.150	0.600	1.000	0.000	0.010	0.400	0.020	4.000	0.000	0.000	0.000	0.080	0.000	0.000	0.188	0.000	0.000	1	2.32	15	35	1.99	0.20
Cooked fresh pasta	10.087	43.137	118.630	4.869	1.682	21.003	1.424	0.000	69.527	0.467	13.919	0.625	5.158	19.032	57.470	14.027	0.139	0.650	2.320	18.480	0.065	0.363	0.031	11.810	0.122	0.000	0.187	0.187	0.005	0.005	0.132	0.016	0.000	1	2.34	22	46	3.16	0.91
Cooked pasta	49.506	67.224	115.000	3.950	0.580	23.500	1.600	0.000	68.900	0.120	7.000	0.500	1.000	20.000	49.000	1.300	0.150	0.600	1.000	0.000	0.010	0.400	0.020	4.000	0.000	0.000	0.000	0.080	0.000	0.000	0.019	0.000	0.000	1	2.32	10	42	1.92	0.20
Cooked wholemeal pasta	10.631	52.619	92.000	5.200	0.940	15.800	3.700	0.000	63.200	0.170	22.800	1.300	1.000	36.700	70.400	3.500	0.170	1.000	25.900	0.000	0.120	0.220	0.050	5.000	0.000	0.000	0.000	0.050	0.000	0.000	0.278	0.000	0.000	1	2.67	16	37	6.49	0.31
Cooked white rice	51.581	55.990	122.700	2.490	0.927	26.090	0.400	0.000	66.500	0.255	8.170	0.200	5.000	11.400	29.900	117.000	0.080	0.260	2.900	0.000	0.012	0.290	0.050	5.330	0.000	0.000	0.000	0.000	0.002	0.000	0.063	0.000	0.000	1	2.18	10	56	1.43	2.04
Cooked brown rice	15.152	48.266	139.700	3.500	1.100	28.950	2.160	0.000	61.000	0.172	19.800	0.500	4.000	49.600	51.300	205.000	0.120	0.634	2.200	0.000	0.020	1.330	0.140	12.000	0.000	0.000	0.000	0.200	0.008	0.000	0.301	0.000	0.000	1	2.11	16	55	2.75	3.15
Cooked couscous	17.313	36.431	161.000	3.790	0.770	34.700	1.400	0.000	57.900	0.029	14.600	0.776	1.800	31.500	134.000	123.000	0.157	0.611	2.200	0.000	0.037	1.750	0.137	30.000	0.000	0.000	0.000	0.040	0.004	0.000	0.060	0.000	0.000	1	2.00	3	55	2.69	1.78
Cooked wild rice	5.137	31.887	97.180	3.990	0.340	19.540	1.800	0.000	73.930	0.049	3.000	0.600	4.000	32.000	101.000	3.000	0.121	1.340	0.800	0.000	0.087	1.287	0.135	26.000	0.000	0.000	0.000	0.240	0.090	0.000	0.119	0.000	0.000	1	2.51	18	57	4.40	0.12
Cooked wheat grain	5.766	29.388	139.000	4.700	0.600	28.700	2.600	0.000	59.300	0.200	39.000	1.000	1.000	32.000	119.000	8.000	0.180	0.940	1.600	0.000	0.050	2.000	0.050	14.000	0.000	0.000	0.000	0.100	0.001	0.000	0.029	0.000	0.000	1	2.18	14	41	3.05	0.42
Cooked bulgur	6.653	32.480	77.600	3.080	0.240	15.780	2.800	0.000	77.760	0.042	10.000	0.960	2.700	32.000	68.000	5.000	0.075	0.570	0.600	0.000	0.028	1.000	0.083	18.000	0.000	0.000	0.000	0.010	0.004	0.000	0.094	0.000	0.000	1	2.77	8	48	4.21	0.13
Cooked quinoa	11.618	38.247	108.880	4.400	1.920	18.500	2.800	0.000	71.610	0.151	17.000	1.490	2.000	64.000	172.000	7.000	0.192	1.090	0.900	0.000	0.110	0.412	0.123	42.000	0.000	0.000	0.000	0.630	0.033	0.000	0.567	0.000	0.000	1	2.41			5.33	0.33
Chicory reconstituted with water	7.197	265.762	12.958	0.281	0.116	2.698	1.465	0.000	95.009	0.035	7.999	0.565	1.183	6.099	100.824	11.904	0.018	0.011	2.239	0.000	0.006	0.841	0.002	0.188	0.000	0.000	0.000	0.000	0.005	0.000	0.065	0.000	0.000	1	5.00			10.54	0.22
Tea	31.535	483.255	0.300	0.075	0.000	0.000	0.000	0.000	99.700	0.000	6.900	0.044	0.610	2.650	10.100	2.520	0.044	0.090	0.100	0.000	0.016	0.037	0.000	0.100	0.000	0.000	0.000	0.000	0.000	0.000	0.000	0.000	0.000	1	5.00			109.69	0.04
Tea/infusion	41.379	338.119	0.000	0.000	0.000	0.000	0.000	0.000	99.700	0.000	2.000	0.080	1.000	1.000	9.000	1.000	0.015	0.040	0.100	0.000	0.004	0.000	0.000	1.000	0.000	0.000	0.000	0.040	0.000	0.000	0.000	0.000	0.000	1	5.00				0.01
Coffee	45.430	185.050	2.500	0.120	0.060	0.300	0.000	0.000	97.500	0.030	4.000	0.160	1.000	42.000	140.000	6.000	0.030	0.090	0.100	0.000	0.080	2.440	0.001	0.500	0.000	0.070	0.000	0.000	0.000	0.000	0.030	0.000	0.000	1	5.00			79.14	0.13
Fresh grapefruit juice	7.140	93.629	37.400	0.620	0.100	8.500	0.300	0.000	88.900	0.010	7.000	0.170	1.000	10.400	129.000	2.600	0.030	0.090	0.100	0.000	0.010	0.190	0.020	14.500	0.000	26.000	0.000	0.120	0.004	0.000	0.016	0.000	0.000	1	3.95	4	48	6.40	0.05
Fresh apple juice	9.443	74.026	43.700	0.200	0.100	10.500	0.200	0.000	87.800	0.020	4.500	0.350	1.000	4.100	105.000	2.200	0.030	0.100	0.100	0.000	0.010	0.090	0.040	8.200	0.000	11.000	0.000	0.000	0.005	0.000	0.025	0.000	0.000	1	3.59	4	40	3.09	0.06
Multifruits purée juice	10.373	93.042	46.942	0.463	0.171	10.560	0.220	0.000	84.900	0.010	7.836	0.429	1.001	9.046	125.280	2.248	0.037	0.066	0.380	0.000	0.017	0.266	0.053	16.382	0.000	83.412	0.000	0.204	0.008	0.000	0.043	0.000	0.000	1	3.46			10.44	0.05
Fresh orange juice	14.065	101.583	40.700	0.630	0.200	8.500	0.200	0.000	88.300	0.020	14.600	0.260	1.000	11.600	193.000	1.710	0.030	0.080	0.100	0.000	0.020	0.360	0.040	30.000	0.000	48.000	0.000	0.120	0.011	0.000	0.029	0.000	0.000	1	3.76	5	52	9.68	0.05
Fresh lemon juice	18.314	6.879	24.800	0.380	0.100	2.000	0.200	0.000	91.400	0.000	10.600	0.210	0.900	5.990	141.000	2.080	0.040	0.050	0.100	0.000	0.010	0.100	0.050	13.700	0.000	46.000	0.000	0.060	0.000	0.000	0.000	0.000	0.000	1	5.00			11.80	0.03
Honey	40.020	19.171	316.000	0.400	0.000	78.600	0.000	0.000	19.000	0.000	7.980	0.500	0.800	3.170	47.000	2.330	0.010	0.110	1.400	0.000	0.050	0.300	0.230	2.600	0.000	1.400	0.000	0.000	0.000	0.000	0.000	0.000	78.6	1	1.38	44	55	0.48	52.43
Oatmeal flakes	7.855	37.094	356.600	11.700	7.000	61.700	8.500	0.000	10.000	1.500	53.000	5.000	4.500	130.000	427.000	10.000	0.400	3.100	1.000	0.000	0.130	0.900	0.200	32.000	0.000	0.000	0.000	0.800	0.109	0.000	2.391	0.000	0.000	1	2.26			3.99	2.41
Fresh liquid cream	9.873	6.023	296.429	2.110	30.242	3.900	0.000	0.000	63.224	19.210	70.000	0.125	11.000	7.612	112.378	42.000	0.019	0.452	1.176	220.250	0.105	0.070	0.023	3.309	0.180	0.800	0.180	0.627	0.246	0.000	0.408	0.000	0.000	1	1.30			2.18	29.70
Fresh thick cream	16.898	10.811	245.500	2.580	24.500	3.650	0.000	0.000	68.950	17.450	84.750	0.120	10.800	8.280	109.500	35.100	0.003	0.372	1.100	241.500	0.185	0.150	0.041	22.000	0.195	0.750	0.120	0.420	0.134	0.000	0.340	0.023	0.000	1	1.52			2.79	26.93
Oleaginous nuts	9.744	9.443	593.000	23.600	52.900	5.600	7.600	0.000	2.600	4.330	136.000	3.660	2.000	168.000	683.000	1.610	1.070	2.920	2.200	0.000	0.150	2.100	0.410	117.000	0.000	0.200	0.000	24.100	0.049	0.000	10.495	0.000	0.000	1	1.47	3.5	18	5.20	6.58
Olives	12.119	7.265	127.500	0.945	13.600	0.270	8.950	0.000	73.600	1.585	59.700	2.130	4.500	44.700	23.650	1283.000	0.180	0.180	1.550	0.000	0.004	0.130	0.020	2.350	0.000	0.450	0.000	2.495	0.099	0.000	0.994	0.000	0.000	1	2.49			4.81	20.48
Spices	8.671	0.601	295.560	9.120	9.880	34.850	26.500	0.000	9.500	2.240	434.000	20.000	0.500	192.000	1343.000	44.000	0.603	4.050	11.775	0.000	0.233	3.470	0.840	39.000	0.000	21.000	0.000	0.875	0.430	0.000	1.075	0.000	0.000	1	5.00			10.87	4.01
Spice plants	8.950	0.400	221.191	10.677	7.235	28.327	34.813	0.000	7.816	2.477	1740.761	87.586	15.312	246.196	1368.889	51.559	0.815	5.436	5.749	0.000	0.470	4.808	1.404	269.477	0.000	48.479	0.000	6.001	1.034	0.000	0.726	0.000	0.000	1	5.00			40.24	4.48
Fresh herbs	9.286	0.683	32.350	3.050	0.820	3.000	4.150	0.000	87.700	0.130	194.000	4.080	4.600	47.500	523.500	21.000	0.180	0.910	0.390	0.000	0.180	1.175	0.170	133.500	0.000	94.000	0.000	1.440	0.016	0.000	0.179	0.000	0.000	1	4.47			62.23	0.49
Chicory powder	10.409	10.971	235.400	6.420	2.042	47.840	27.420	0.000	4.020	0.616	34.200	9.760	0.500	126.800	2113.000	177.200	0.048	0.148	3.500	0.000	0.106	17.020	0.030	4.060	0.000	0.000	0.000	0.000	0.087	0.000	1.129	0.000	0.000	1	5.00			8.99	3.43
Instant coffee powder	13.113	24.434	123.950	9.835	2.064	16.468	10.281	0.000	36.381	1.221	108.608	2.270	4.237	183.723	1985.595	80.121	0.068	0.412	5.491	18.879	0.112	12.716	0.026	5.711	0.073	0.310	0.022	0.064	0.016	0.000	0.088	0.000	7.28	1	3.21			11.99	7.83
Pickle	13.536	8.134	11.000	0.900	0.400	1.000	1.100	0.000	93.500	0.066	16.500	0.840	0.400	7.520	103.000	737.000	0.125	0.280	0.000	0.000	0.020	0.100	0.010	6.000	0.000	1.000	0.000	0.070	0.061	0.000	0.045	0.000	0.000	1	5.00			20.89	10.49
Shallot	17.814	7.794	21.700	1.900	0.150	3.200	1.800	0.000	79.400	0.026	31.000	0.950	2.000	16.500	242.000	11.000	0.088	0.400	1.200	0.000	0.030	0.200	0.222	348.000	0.000	9.000	0.000	0.260	0.003	0.000	0.056	0.000	0.000	1	5.00			38.08	0.19
Garlic	28.774	3.513	92.600	7.100	0.500	14.900	1.800	0.000	62.200	0.080	98.700	1.220	2.300	20.700	446.000	13.400	0.200	0.860	5.100	0.000	0.070	0.500	0.800	4.000	0.000	19.700	0.000	0.010	0.020	0.000	0.220	0.000	0.000	1	2.73			8.60	0.31
Vegetable omelette	5.809	47.943	168.512	7.881	12.753	5.551	0.906	0.000	71.509	3.191	46.385	1.163	30.120	12.728	181.827	272.741	0.113	0.671	7.144	61.992	0.194	0.512	0.151	28.821	0.509	4.682	0.806	2.395	0.109	0.033	2.668	0.109	0.000	1	2.15			7.06	8.68
Omelette	9.944	41.569	213.134	13.283	16.630	2.578	1.229	0.000	64.509	4.890	152.842	5.640	52.297	24.894	227.007	192.310	0.097	1.195	11.176	110.454	0.346	0.438	0.207	56.471	0.907	7.771	1.437	2.774	0.174	0.058	2.584	0.195	0.000	1	2.23			9.82	10.12
Endive salad with walnuts and Roquefort (homemade)	5.208	13.564	189.682	5.730	17.878	1.308	1.753	0.000	70.705	5.873	156.303	0.506	11.491	21.791	179.638	428.251	0.139	1.106	2.049	55.660	0.152	0.394	0.088	52.581	0.110	3.244	0.064	2.535	0.313	0.000	5.299	0.000	0.000	1	1.93			5.58	14.93
Noodle soup	7.927	103.630	53.288	1.361	1.989	7.496	0.571	0.000	87.374	1.211	8.018	0.187	185.248	7.683	26.950	128.497	0.054	0.195	1.048	15.066	0.005	0.159	0.015	9.719	0.030	0.317	0.026	0.073	0.008	0.000	0.149	0.000	0.000	1	3.26			12.72	3.65
Tabbouleh	13.435	34.100	163.805	4.651	5.847	23.058	1.478	0.000	62.813	0.876	17.733	0.838	1.960	25.442	179.770	409.620	0.118	0.513	3.666	0.420	0.049	2.189	0.166	26.680	0.032	10.906	0.000	0.734	0.048	0.002	0.442	0.006	0.000	1	2.03			3.62	7.10
Nicoise salad	7.569	47.367	108.193	8.016	7.388	2.332	1.922	0.000	78.010	1.444	50.327	1.121	8.567	25.506	196.520	517.291	0.062	0.475	11.436	19.662	0.105	2.909	0.186	27.366	1.911	19.762	1.056	1.193	0.076	0.070	0.521	0.020	0.000	1	2.59			14.24	9.48
Vegetable salad with tuna	7.955	51.718	111.165	8.905	6.594	3.849	1.059	0.000	77.821	1.096	16.013	0.662	4.647	18.787	212.224	366.368	0.044	0.304	18.948	1.363	0.046	4.977	0.207	19.338	1.340	3.540	1.628	1.139	0.050	0.048	0.450	0.009	0.000	1	2.60			13.22	6.82
Fried vegetables (homemade)	10.316	45.279	61.946	1.239	4.851	3.334	2.423	0.000	86.811	0.532	30.655	0.543	1.072	10.741	127.402	161.051	0.076	0.364	1.222	0.000	0.057	0.497	0.091	24.423	0.000	11.393	0.000	3.709	0.074	0.000	2.699	0.000	0.000	2	3.01			11.74	3.08
Ratatouille	27.286	62.337	83.840	1.060	7.303	3.469	1.811	0.000	84.730	1.111	20.852	0.571	1.199	17.252	313.441	202.148	0.114	0.203	0.639	0.000	0.035	0.597	0.116	30.728	0.000	19.938	0.000	1.352	0.069	0.000	0.536	0.000	0.000	2	2.55			6.42	4.53
Velvety greens (homemade)	5.838	85.833	44.968	1.125	2.839	3.685	1.093	0.000	89.666	1.910	36.954	0.741	190.407	15.865	167.609	223.085	0.077	0.209	0.799	17.808	0.062	0.386	0.095	40.528	0.010	9.501	0.008	0.394	0.048	0.000	0.079	0.002	0.000	2	3.58			23.29	6.04
Vegetable cream (homemade)	10.588	105.336	54.501	1.316	4.122	2.994	0.725	0.000	89.112	2.780	37.525	0.245	172.844	7.953	102.383	218.306	0.030	0.232	0.682	32.119	0.055	0.218	0.041	22.006	0.052	2.453	0.041	0.235	0.027	0.000	0.122	0.001	0.000	2	3.22			14.90	7.29
Smoked fish	18.021	17.144	440.705	8.600	44.745	0.900	0.000	0.000	41.800	27.415	43.200	0.555	20.900	18.400	126.000	1196.500	0.053	0.375	14.250	355.000	0.120	1.750	0.190	6.500	5.930	0.000	11.380	1.590	0.268	0.941	1.207	0.064	0.000	2	0.99			15.80	58.40
Boeuf Bourguignon (homemade)	5.008	33.293	196.000	30.000	8.500	0.000	0.000	0.000	60.800	3.570	11.000	3.700	6.000	23.000	320.000	68.000	0.100	6.540	26.900	0.000	0.260	4.000	0.330	10.000	2.000	0.000	0.000	0.300	0.025	0.000	0.216	0.042	0.000	2	3.15			8.67	6.37
Sautéed veal (homemade)	5.051	30.409	191.514	15.403	14.250	0.510	0.386	0.000	67.467	3.409	20.321	1.319	2.474	14.827	311.762	268.355	0.055	1.728	7.037	0.000	0.222	5.645	0.350	8.715	1.040	1.330	0.008	3.280	0.106	0.002	3.277	0.048	0.000	2	2.42			6.72	8.95
Confit of duck/goose (homemade)	5.609	28.184	220.000	30.700	10.800	0.000	0.000	0.000	57.300	4.890	9.600	2.400	17.000	17.500	321.000	944.000	0.100	5.700	28.000	21.000	0.336	7.100	0.300	4.170	2.950	0.000	1.800	0.460	0.034	0.000	1.220	0.368	0.000	2	3.10			9.82	20.71
Duck breast (homemade)	12.377	27.538	191.000	26.700	9.050	0.600	0.000	0.000	62.900	2.900	5.000	4.800	15.000	31.200	390.000	435.000	0.500	2.100	34.000	16.000	0.880	13.500	0.980	20.000	3.300	3.500	0.930	0.460	0.062	0.014	1.058	0.156	0.000	2	3.00			15.68	10.53
Black sausage (homemade)	13.335	32.149	260.800	14.800	21.600	1.800	0.000	0.000	53.900	11.500	27.200	22.800	40.000	8.500	155.000	749.000	0.100	0.700	11.000	7.000	0.062	0.530	0.094	25.400	0.200	0.000	0.750	0.110	0.216	0.000	1.740	0.000	0.000	2	2.13			7.22	27.98
Smoked ham	5.566	10.596	303.000	23.800	23.600	0.200	0.000	0.000	52.600	8.000	7.500	0.500	12.000	18.000	250.000	1620.000	0.100	2.100	12.000	0.000	0.160	4.700	0.400	3.000	0.670	0.000	0.600	0.200	0.172	0.014	2.962	0.081	0.000	2	2.48			4.73	34.95
Foie gras	6.610	12.481	516.500	7.150	53.450	1.700	0.000	0.000	35.600	21.400	5.850	5.800	2.000	11.700	150.000	473.000	0.800	1.200	10.000	3416.500	0.584	6.105	0.950	460.000	4.550	22.850	2.750	1.375	0.000	0.000	0.525	0.368	0.000	2	0.50			14.39	39.09
Bayonne ham	27.443	16.726	236.000	27.400	13.800	0.540	0.000	0.000	52.700	4.700	16.300	1.400	1.200	25.500	437.000	2105.000	0.080	2.380	7.000	0.000	0.300	8.700	0.600	1.500	0.500	0.000	0.600	0.200	0.065	0.010	1.120	0.070	0.000	2	2.88			7.44	36.79
Spun cheese	7.068	15.137	241.000	18.400	17.500	2.500	0.000	0.000	57.700	10.700	403.000	0.200	15.900	25.000	67.000	200.000	0.010	2.900	8.000	187.000	0.350	0.190	0.070	11.000	2.200	0.000	0.130	0.330	0.300	0.000	0.251	0.000	0.000	2	2.40			6.23	19.03
Dry goat cheese	8.213	12.832	451.100	30.520	35.590	2.170	0.000	0.000	29.010	24.609	895.000	1.880	30.600	54.000	48.000	346.000	0.627	1.590	5.500	478.000	1.190	2.400	0.080	4.000	0.120	0.000	0.700	0.310	0.000	0.000	0.845	0.000	0.000	2	2.39			5.28	42.16
Swiss Cheese	9.415	13.129	365.000	24.500	29.900	0.000	0.000	0.000	38.600	18.800	788.000	0.300	31.400	32.000	98.000	648.000	0.090	5.100	7.000	200.000	0.300	0.100	0.070	20.000	1.500	0.000	0.240	0.500	0.208	0.000	0.453	0.000	0.000	2	2.32			4.89	37.62
Fresh cheese	11.311	11.498	317.950	10.750	29.650	2.025	0.000	0.000	54.200	13.855	83.550	0.400	19.400	9.350	130.500	469.500	0.060	0.814	11.050	209.000	0.258	0.320	0.064	31.300	0.245	0.000	0.385	0.675	0.213	0.000	0.542	0.000	0.000	2	1.70			3.04	27.61
Parmesan powder	12.749	5.709	427.570	38.460	28.610	4.060	0.000	0.000	20.840	17.301	1109.000	0.900	131.000	38.000	125.000	1529.000	0.238	3.870	17.700	223.000	0.486	0.114	0.049	10.000	2.260	0.000	0.500	0.250	0.190	0.000	0.943	0.000	0.000	2	2.97			6.23	47.76
Veined cheese (or blue)	13.865	14.538	352.670	18.700	30.730	0.000	0.000	0.000	46.100	19.830	512.330	0.400	34.070	20.500	122.500	1203.000	0.080	3.700	5.900	152.000	0.500	0.900	0.140	78.330	1.120	0.000	0.230	0.550	0.264	0.000	0.453	0.000	0.000	2	2.03			4.55	47.00
Soft cheese	14.351	14.981	326.500	20.800	26.400	0.100	0.000	0.000	50.000	17.000	370.000	0.281	22.800	18.200	152.000	595.000	0.070	2.580	5.100	194.000	0.500	1.130	0.217	65.000	1.470	0.000	0.300	0.500	0.181	0.000	0.380	0.000	0.000	2	2.25			4.80	34.14
Hard cheese	17.105	14.403	413.250	29.000	33.400	0.250	0.000	0.000	35.000	19.800	1003.500	0.330	32.300	39.900	68.450	328.000	0.236	4.420	6.900	262.500	0.390	0.100	0.080	17.500	1.550	0.000	0.685	0.560	0.296	0.000	0.728	0.010	0.000	2	2.41			5.14	34.62
Cottage cheese (40% fat)	9.257	43.639	91.900	4.200	6.700	3.700	0.000	0.000	84.300	4.230	123.000	0.140	10.000	11.000	147.000	39.000	0.010	0.300	2.000	64.000	0.160	0.220	0.030	33.000	0.300	0.000	0.200	0.140	0.048	0.000	0.136	0.000	0.000	2	2.59			5.26	6.96
Plain white cheese (40% fat)	14.280	46.437	113.000	7.300	7.700	3.600	0.000	0.000	81.700	5.040	112.000	0.080	10.000	10.200	108.000	36.400	0.030	0.410	2.000	68.000	0.240	0.250	0.045	26.000	0.340	0.600	0.130	0.170	0.047	0.000	0.134	0.000	0.000	2	2.50			4.68	8.15
White cheese (0% fat)	16.369	91.936	47.800	7.400	0.240	4.000	0.000	0.000	86.800	0.100	118.000	0.160	10.000	11.700	124.000	42.100	0.010	0.490	1.900	2.000	0.200	0.200	0.058	24.000	0.390	0.500	0.034	0.000	0.000	0.000	0.000	0.000	0.000	2	3.77			8.71	0.74
Plain white cheese (20% fat)	32.923	82.055	76.050	7.900	3.250	3.800	0.000	0.000	84.400	2.050	123.000	0.130	10.000	10.200	124.000	40.200	0.010	0.516	4.500	29.000	0.200	0.190	0.047	26.000	0.370	0.000	0.775	0.075	0.028	0.000	0.083	0.000	0.000	2	3.02			7.21	3.67
Petit Suisse (20% fat)	7.669	40.070	98.300	9.600	5.100	3.500	0.000	0.000	81.800	3.210	117.000	0.200	14.000	10.000	98.000	34.000	0.010	0.480	2.000	50.000	0.240	0.260	0.060	25.000	0.300	0.000	0.200	0.100	0.037	0.000	0.110	0.000	0.000	2	2.78			5.39	5.34
Gratin dauphinois	6.181	39.789	129.078	2.388	7.715	12.508	1.120	0.000	75.239	4.856	43.110	0.275	5.844	16.838	279.596	95.274	0.119	0.368	1.723	58.379	0.069	0.880	0.195	6.727	0.075	8.187	0.050	0.186	0.066	0.000	0.130	0.000	0.000	2	2.12			3.83	8.70
Fries	24.438	28.021	203.409	1.571	15.069	15.372	1.512	0.000	64.680	2.080	4.333	0.263	2.658	18.512	318.528	392.260	0.162	0.253	2.310	0.000	0.017	1.210	0.252	8.400	0.000	10.920	0.000	5.254	0.113	0.000	5.185	0.000	0.000	2	1.68	22	75	4.20	8.68
Fried potatoes (homemade)	31.879	52.233	154.738	1.738	9.097	16.473	1.753	0.000	69.353	1.265	6.737	0.380	2.786	20.776	347.479	197.070	0.178	0.278	2.033	0.000	0.019	1.302	0.272	9.033	0.000	11.805	0.000	3.172	0.072	0.000	3.128	0.000	0.000	2	1.92	21	75	4.57	4.69
Croutons (homemade)	5.723	10.365	564.000	13.800	38.000	38.400	4.200	0.000	5.000	13.500	20.000	1.300	6.300	25.000	161.000	246.000	0.100	0.700	1.000	0.000	0.220	1.100	0.440	30.000	0.000	0.000	0.000	0.000	0.057	0.000	2.440	0.000	0.000	2	1.45			1.37	23.92
Toasted bread	18.386	26.134	348.150	9.555	3.195	70.300	4.310	0.000	8.675	1.000	52.600	1.265	5.150	34.750	210.000	715.000	0.145	0.813	2.000	0.000	0.059	1.290	0.111	36.550	0.000	0.000	0.000	0.138	0.027	0.002	0.531	0.004	0.000	2	1.84	11	73	1.75	11.59
White breads	47.067	123.036	240.650	8.070	1.175	49.400	3.165	0.000	30.600	0.234	39.600	1.170	6.325	23.950	113.850	620.500	0.139	0.915	5.030	0.000	0.065	1.075	0.070	23.500	0.000	0.000	0.000	0.415	0.028	0.000	0.333	0.000	0.000	2	1.94	14	95	2.23	9.10
Wholemeal toast	7.397	15.608	269.600	16.270	4.070	41.960	9.200	0.000	24.250	0.922	130.000	2.960	3.900	99.000	326.000	583.000	0.670	2.150	52.600	0.000	0.284	5.732	0.237	52.000	0.000	0.000	0.000	0.630	0.030	0.000	0.709	0.001	0.000	2	2.74			7.01	9.61
Black bread	8.256	26.723	216.800	8.150	2.160	41.200	5.930	0.000	31.800	0.311	92.500	5.080	9.250	110.000	167.000	393.000	0.203	1.010	3.200	0.000	0.065	0.775	0.110	14.200	0.130	0.133	0.000	0.320	0.070	0.000	0.623	0.000	0.000	2	2.12	18	50	4.37	6.01
Wholemeal bread	35.549	61.753	251.650	8.965	1.550	45.585	5.400	0.000	30.600	0.338	91.950	2.760	14.500	58.500	219.000	606.500	0.190	1.675	4.500	0.000	0.073	3.350	0.160	26.800	0.155	0.000	0.000	0.430	0.041	0.000	0.531	0.000	0.000	2	2.03	9	71	3.69	9.06
Egg pasta	21.548	53.037	124.900	6.455	3.586	16.690	1.120	0.000	70.610	1.065	25.870	0.842	12.340	17.360	72.100	36.010	0.120	0.735	4.600	50.400	0.160	0.298	0.050	25.300	0.333	0.000	0.510	0.371	0.014	0.013	0.329	0.042	0.000	2	2.36	18	40	5.14	2.12
Buckwheat pancake	5.967	24.062	224.859	6.402	3.897	41.042	2.440	0.000	44.098	1.672	22.602	1.614	5.330	92.583	204.684	405.901	0.302	1.433	4.722	29.112	0.117	2.766	0.279	45.526	0.099	0.000	0.177	0.226	0.038	0.004	0.524	0.013	0.000	2	1.89	22	102	4.21	8.25
Plain crepe (homemade)	15.510	33.946	321.542	7.665	7.031	56.892	1.910	0.000	25.484	1.193	56.847	0.878	12.230	16.265	141.498	226.334	0.088	0.667	6.350	19.045	0.140	1.594	0.072	17.670	0.213	0.343	0.172	2.131	0.056	0.004	2.131	0.014	4	2	1.73	39	67	2.39	7.66
Cider	6.281	61.031	32.000	0.000	0.000	2.400	0.000	3.200	93.700	0.000	5.460	0.810	0.700	3.210	120.000	4.000	0.003	0.020	2.200	0.000	0.000	0.010	0.010	0.100	0.000	7.000	0.000	0.000	0.000	0.000	0.000	0.000	0.000	2	4.30			3.56	0.06
Sparkling wine	7.369	40.592	73.500	0.100	0.000	2.360	0.000	9.100	88.600	0.000	9.600	0.800	1.000	5.640	48.000	2.700	0.026	0.024	0.000	0.000	0.010	0.100	0.020	0.000	0.000	0.000	0.000	0.000	0.000	0.000	0.000	0.000	0.000	2	2.68			1.08	0.04
Sweet white wine	9.544	27.889	95.800	0.200	0.000	5.900	0.000	10.200	83.400	0.000	14.000	0.580	35.000	11.000	110.000	13.000	0.043	0.059	0.030	0.000	0.010	0.080	0.010	0.100	0.000	0.000	0.000	0.000	0.000	0.000	0.000	0.000	0.000	2	2.34			1.95	0.18
Aperitif wines	12.477	16.481	143.000	0.010	0.000	13.800	0.000	12.500	74.000	0.000	8.800	0.600	1.200	7.000	50.000	3.000	0.160	0.030	0.000	0.000	0.000	0.020	0.005	0.000	0.000	0.000	0.000	0.000	0.000	0.000	0.000	0.000	0.000	2	1.91			0.65	0.04
Sweet wines	14.766	15.301	136.000	0.137	0.000	9.810	0.000	13.700	76.000	0.000	7.650	0.520	1.000	10.700	92.100	6.700	0.891	0.137	0.075	0.000	0.012	0.098	0.010	0.100	0.000	0.000	0.000	0.000	0.000	0.000	0.000	0.000	0.000	2	1.96			2.17	0.09
Blond beer	19.516	167.655	41.000	0.400	0.000	3.200	0.000	3.800	91.000	0.000	7.000	0.000	1.200	8.000	30.000	6.000	0.010	0.000	0.000	0.000	0.030	0.300	0.040	3.000	0.000	0.000	0.000	0.000	0.000	0.000	0.000	0.000	0.000	2	3.74			1.41	0.08
Champagne	23.480	55.699	76.100	0.300	0.000	1.400	0.000	9.900	86.800	0.000	7.140	0.110	0.700	7.960	22.800	1.930	0.006	0.042	2.200	0.000	0.010	0.100	0.020	0.000	0.000	0.000	0.000	0.000	0.000	0.000	0.000	0.000	0.000	2	2.64			0.75	0.03
Rosé wine	31.578	130.460	70.600	0.150	0.000	1.750	0.000	9.000	88.900	0.000	12.000	0.950	1.000	7.000	75.000	4.000	0.028	0.034	0.200	0.000	0.040	0.085	0.022	0.200	0.000	0.000	0.000	0.000	0.000	0.000	0.000	0.000	0.000	2	2.74			1.51	0.06
White wine	38.074	89.567	64.000	0.076	0.000	0.530	0.000	8.800	87.100	0.000	5.640	0.590	0.900	5.720	74.000	1.700	0.008	0.083	0.100	0.000	0.028	0.066	0.050	0.283	0.000	0.000	0.000	0.000	0.000	0.000	0.000	0.000	0.000	2	2.89			1.30	0.02
Red wine	67.649	240.656	69.400	0.142	0.000	0.410	0.000	9.600	87.200	0.000	6.040	0.715	0.900	6.930	109.000	1.200	0.011	0.160	0.100	0.000	0.023	0.126	0.029	0.600	0.000	0.000	0.000	0.000	0.000	0.000	0.000	0.000	0.000	2	2.77			1.34	0.02
Sweet fruit compote (homemade)	5.280	27.464	83.737	0.370	0.177	20.160	1.063	0.000	76.886	0.016	12.333	0.361	0.515	7.093	107.539	2.097	0.053	0.072	0.341	0.000	0.040	0.188	0.030	4.281	0.000	2.619	0.000	0.158	0.014	0.000	0.041	0.000	10.000	2	2.52			1.81	6.72
Sweetened applesauce	17.227	38.321	113.808	0.136	0.080	28.116	0.880	0.000	70.676	0.006	3.620	0.196	0.040	2.700	59.600	1.960	0.023	0.030	0.300	0.000	0.024	0.067	0.022	2.400	0.000	0.800	0.000	0.128	0.002	0.000	0.010	0.000	9.000	2	2.14			0.71	6.04
Quiche Lorraine (homemade)	12.405	37.299	202.000	0.490	0.260	49.450	1.050	0.000	48.600	0.006	19.250	0.435	1.450	6.250	104.200	15.850	0.070	0.020	0.600	0.000	0.010	0.040	0.010	5.000	0.000	20.000	0.000	0.035	0.061	0.000	0.085	0.000	41.95	2	1.76			3.55	54.11
Stew veal blanquette (homemade)	5.838	36.547	285.978	8.589	22.363	12.573	0.661	0.000	54.141	13.382	120.715	0.681	15.887	12.399	133.348	415.953	0.067	0.990	6.126	164.339	0.181	1.189	0.092	18.822	0.428	0.414	0.567	0.658	0.129	0.012	1.037	0.044	0.000	2	2.42			6.71	11.68
Fish soup (homemade)	6.424	78.416	149.355	11.044	9.708	4.478	0.807	0.000	71.871	5.557	29.251	2.080	4.693	13.054	212.611	231.384	0.059	2.047	5.546	55.766	0.154	3.375	0.238	12.388	0.644	2.250	0.147	0.389	0.070	0.004	0.681	0.420	0.000	2	2.91			11.66	3.63
Garnished sauerkraut	6.038	89.990	86.654	9.126	5.432	0.275	0.232	0.000	84.143	0.779	20.073	0.668	5.426	15.638	111.410	173.594	0.041	0.292	9.882	3.120	0.037	0.374	0.045	9.407	0.819	0.816	0.339	2.449	0.038	0.082	1.732	0.009	0.000	2	2.42			5.42	12.84
Gratin of endives and ham (homemade)	6.324	46.288	124.389	7.614	7.672	6.214	0.925	0.000	74.617	3.407	23.418	0.891	4.285	14.661	287.681	544.900	0.085	0.812	4.925	7.539	0.097	1.895	0.227	10.422	0.204	9.301	0.097	0.156	0.069	0.002	0.676	0.022	0.000	2	2.25			4.86	13.28
Vegetables gratin (homemade)	13.407	51.935	137.022	6.172	9.424	6.879	1.516	0.000	75.084	5.895	108.357	0.756	5.808	15.519	201.467	308.550	0.074	0.963	2.934	71.617	0.114	0.702	0.051	12.087	0.217	1.567	0.145	0.266	0.064	0.000	0.386	0.011	0.000	2	2.34			5.90	9.92
Vegetable gardener	15.725	47.861	118.099	4.972	8.020	6.362	1.157	0.000	78.007	4.861	127.861	0.514	8.393	15.839	208.331	181.589	0.083	0.735	2.372	70.558	0.116	0.445	0.085	32.731	0.236	11.509	0.170	0.529	0.083	0.004	0.325	0.009	0.000	2	3.35			12.42	5.74
Stuffed tomato (homemade)	7.712	61.586	53.956	2.507	0.520	9.810	4.407	0.000	81.071	0.078	42.665	1.307	29.770	20.949	227.448	398.708	0.123	0.586	1.072	0.000	0.097	0.834	0.125	24.195	0.006	5.846	0.000	0.299	0.069	0.000	0.046	0.000	0.000	2	2.23			7.12	12.04
Surimi	7.669	21.781	146.094	6.841	11.068	4.768	2.117	0.000	72.840	3.709	29.922	1.213	2.659	22.533	601.407	455.369	0.171	0.794	4.278	0.000	0.115	1.715	0.180	49.725	0.141	8.168	0.000	2.494	0.068	0.002	1.698	0.017	0.000	3	2.67			13.29	9.59
Andouillette	5.609	32.656	102.000	8.400	2.400	11.800	0.000	0.000	73.200	0.170	18.200	0.300	8.000	13.700	58.000	662.000	0.040	0.700	8.300	28.000	0.020	0.200	0.030	2.000	0.710	0.000	0.000	1.100	0.011	0.224	0.022	0.034	0.000	3	2.61			4.73	28.48
Strasbourg sausage	5.008	17.245	275.700	24.500	19.300	1.000	0.000	0.000	48.700	8.660	35.600	2.300	15.000	9.600	64.000	1090.000	0.200	4.300	19.000	52.000	0.150	0.960	0.090	20.000	0.910	1.000	0.500	0.410	0.168	0.000	1.950	0.245	0.000	3	1.91			3.28	25.66
White sausage	5.251	28.684	287.000	12.500	25.900	1.000	0.000	0.000	57.000	9.180	25.000	1.100	7.000	13.100	192.000	834.000	0.064	1.140	5.570	0.000	0.200	2.460	0.110	3.580	0.625	9.400	0.262	0.380	0.200	0.003	2.400	0.017	0.000	3	2.23			5.19	24.64
Chorizo	5.423	8.793	229.719	14.664	18.524	1.104	0.124	0.000	62.581	9.656	30.585	0.676	7.659	16.943	201.990	710.523	0.040	0.832	13.907	76.491	0.122	4.062	0.221	12.981	1.076	16.241	0.223	0.523	0.116	0.015	1.196	0.095	0.000	3	1.83			3.51	48.17
Merguez	5.823	22.750	477.000	23.800	41.900	1.150	0.000	0.000	43.100	15.700	35.800	2.800	7.000	27.500	479.000	1730.000	0.080	2.300	4.900	0.000	0.260	4.600	0.320	6.200	0.930	0.000	0.200	1.400	0.416	0.000	3.210	0.100	0.000	3	2.29			4.91	31.19
Rillettes	8.213	13.303	296.000	19.800	23.400	1.600	1.000	0.000	52.400	12.300	22.900	1.800	25.000	21.100	762.000	891.000	0.100	2.800	5.000	23.000	0.200	4.700	0.240	6.680	1.450	1.000	0.000	1.700	0.152	0.001	0.728	0.036	0.000	3	1.34			2.91	33.63
Various sausages	8.585	23.527	446.634	14.369	43.129	0.256	0.338	0.000	38.309	18.060	16.630	1.407	0.886	15.583	211.251	444.515	0.069	1.638	16.956	1.338	0.180	3.417	0.142	3.825	0.511	0.697	0.133	0.514	0.304	0.009	3.775	0.091	0.000	3	2.12			3.72	26.03
Meat dough	12.341	13.333	334.000	18.800	27.310	1.000	0.000	0.000	51.700	9.655	11.500	0.900	8.000	18.000	304.000	809.000	0.100	2.200	9.000	11.000	0.215	4.165	0.270	5.000	0.490	0.700	0.500	0.250	0.250	0.000	3.037	0.144	0.000	3	2.00			17.93	25.91
Saucisson	14.301	11.985	305.106	14.829	25.491	4.103	0.500	0.000	51.416	11.198	29.446	6.007	12.205	14.553	161.987	634.421	0.268	2.638	25.099	1904.591	0.755	3.556	0.265	103.183	6.791	8.007	0.506	0.577	0.210	0.046	2.022	0.203	0.000	3	2.25			4.46	46.59
Yogurt 0% fat fruit, sweetened	11.103	126.425	422.000	26.600	34.700	0.900	0.000	0.000	30.500	12.700	39.300	1.410	7.000	29.700	490.000	1940.000	0.077	2.650	10.285	0.000	0.300	7.400	0.600	13.400	1.000	0.000	0.000	0.280	0.322	0.000	3.759	0.184	0.000	3	3.73	3	24	11.02	0.87
Fruit yogurt	14.394	74.936	45.200	4.300	0.110	6.000	0.700	0.000	88.300	0.053	128.000	0.200	11.000	12.600	164.000	56.000	0.016	0.410	2.300	20.000	0.270	0.260	0.145	30.500	0.160	0.500	0.200	0.080	0.008	0.000	0.012	0.000	0.000	3	2.82	5	33	5.72	2.16
Sweet yogurt	5.666	53.265	76.000	3.800	1.600	11.600	0.400	0.000	81.600	0.970	116.000	0.350	14.100	11.700	155.000	49.300	0.029	0.500	1.300	21.000	0.210	0.200	0.090	24.400	0.150	0.800	0.070	0.110	0.013	0.000	0.022	0.003	0.000	3	2.70			4.15	1.79
Custard (homemade)	5.952	11.760	82.450	3.750	1.110	13.600	0.000	0.000	80.150	0.705	121.000	0.110	14.000	11.500	171.500	51.500	0.019	0.430	1.500	15.500	0.190	0.115	0.045	11.000	0.050	0.500	0.105	0.040	0.007	0.000	0.017	0.001	9.100	3	2.39			5.71	9.32
Creme brulee	6.009	28.873	110.774	4.639	3.967	14.102	0.000	0.000	76.213	1.734	103.766	0.513	16.313	10.524	142.367	44.571	0.013	0.681	3.098	59.523	0.179	0.083	0.040	9.214	0.392	1.052	0.360	0.484	0.024	0.019	0.309	0.041	10.340	3	1.55			3.41	25.38
Dessert cream	6.181	39.091	289.365	4.091	20.606	21.828	0.000	0.000	53.195	11.853	89.692	0.918	19.635	9.201	119.903	37.131	0.029	0.749	5.049	194.312	0.138	0.075	0.056	13.082	0.407	0.530	0.678	0.918	0.157	0.031	0.690	0.068	19.200	3	2.13			3.41	17.70
Bifidus yogurt with fruit	6.625	66.757	142.899	4.453	4.522	18.878	1.387	0.000	67.592	2.852	100.872	0.666	8.101	25.675	267.695	40.973	0.100	0.493	2.281	37.758	0.143	0.381	0.044	7.675	0.149	0.780	0.044	0.193	0.043	0.000	0.102	0.000	13.280	3	2.47			3.84	11.59
Milk rice	6.725	38.771	99.000	3.700	2.300	15.100	0.300	0.000	77.000	1.400	122.000	0.200	15.000	13.000	141.000	44.000	0.010	0.520	1.400	20.000	0.180	0.100	0.040	19.000	0.100	1.800	0.000	0.070	0.024	0.000	0.045	0.056	8.300	3	2.14			2.28	10.36
Whole milk yogurt with fruit	7.397	63.697	130.559	2.935	3.801	21.143	0.048	0.000	71.347	2.398	84.997	0.071	7.412	8.797	111.443	84.752	0.016	0.308	1.995	35.528	0.126	0.131	0.021	3.236	0.136	0.572	0.039	0.089	0.021	0.000	0.073	0.001	15.000	3	2.45			3.94	13.45
Caramel cream	8.499	35.064	100.000	3.510	2.810	15.200	0.000	0.000	76.700	1.860	115.000	0.125	15.000	9.030	153.000	44.900	0.017	0.410	0.300	31.500	0.208	0.160	0.063	15.500	0.153	1.500	0.040	0.095	0.021	0.000	0.063	0.000	12.000	3	1.97			2.94	10.40
Reconstituted lyophilized mashed potatoes	7.412	47.912	172.050	4.440	2.910	31.990	0.000	0.000	59.795	1.129	72.005	0.426	13.120	8.490	108.300	48.700	0.014	0.475	3.125	42.750	0.192	0.062	0.034	16.350	0.357	0.650	0.345	0.290	0.014	0.008	0.225	0.028	29.560	3	2.49	12	85	5.04	24.09
Breadsticks	5.051	4.309	92.044	2.279	2.550	14.989	1.462	0.000	77.313	1.698	28.559	0.336	4.484	19.921	328.237	128.816	0.151	0.338	1.477	22.068	0.053	1.130	0.235	8.292	0.054	10.307	0.036	0.117	0.018	0.000	0.089	0.000	0.000	3	1.84			3.16	10.60
Cracotte	6.081	10.078	362.586	10.246	10.457	56.879	4.281	0.000	15.988	1.492	45.912	1.587	8.611	30.860	170.825	591.776	0.212	1.149	6.942	0.000	0.189	4.060	0.161	98.980	0.002	0.011	0.000	1.151	0.086	0.000	1.568	0.000	0.000	3	1.82			3.43	9.68
Crispbread	8.714	15.053	351.000	9.600	3.900	74.200	3.850	0.000	6.400	0.819	42.300	1.000	10.000	29.800	254.000	599.000	0.129	0.639	7.438	0.000	0.090	3.300	0.693	72.500	0.000	0.000	0.000	0.260	0.268	0.000	1.080	0.000	0.000	3	1.83	57	81	2.48	10.64
Sandwich bread	11.618	30.196	382.700	9.350	8.190	67.900	5.400	0.000	5.060	3.010	42.200	1.000	9.800	23.400	163.000	431.000	0.180	3.500	10.100	0.000	0.070	1.400	0.140	21.000	0.000	0.000	0.000	0.630	0.461	0.000	1.010	0.000	0.000	3	1.96			3.24	7.77
Rusk	15.481	13.854	248.750	8.850	4.750	42.645	3.430	0.000	32.450	0.970	125.500	1.500	6.500	50.650	175.000	447.000	0.177	1.005	4.000	0.000	0.080	1.800	0.070	20.500	0.000	0.000	0.000	0.850	0.184	0.000	1.482	0.000	2.581	3	1.79			2.03	12.53
Wasa	5.809	15.694	394.000	10.100	6.850	72.900	3.900	0.000	4.700	2.700	40.000	1.300	3.500	29.000	161.000	477.000	0.180	0.950	1.700	0.000	0.150	1.300	0.090	21.000	0.000	0.000	0.440	2.000	0.048	0.003	0.732	0.009	0.000	3	4.39			3.99	6.40
Wholemeal rusks	6.982	11.257	312.000	10.000	1.900	63.700	16.000	0.000	6.000	0.500	40.000	3.100	5.700	100.000	500.000	400.000	0.400	3.000	2.000	0.000	0.100	2.000	0.200	40.000	0.000	0.000	0.000	0.500	0.075	0.000	0.516	0.000	0.000	3	2.25			2.86	11.25
Wholemeal sandwish bread	12.935	42.532	380.330	12.600	7.770	65.000	8.340	0.000	3.985	2.145	40.050	2.100	4.000	66.450	291.500	567.500	0.180	1.700	1.700	0.000	0.125	1.750	0.315	43.500	0.000	0.000	0.000	1.495	0.129	0.000	1.755	0.001	0.000	3	2.41			6.79	7.78
Puffed cereal patties	7.426	13.742	219.900	12.950	3.350	34.490	6.800	0.000	38.580	0.747	107.000	2.430	2.000	82.000	248.000	472.000	0.377	1.800	40.300	0.000	0.216	4.714	0.209	50.000	0.000	0.000	0.000	0.550	0.020	0.000	0.574	0.001	5.129	3	2.14	15	81	6.01	7.91
Lemon pie	5.108	37.993	348.275	12.465	4.183	65.188	6.919	0.000	8.949	0.698	33.826	4.494	2.730	140.747	456.401	243.550	0.371	3.918	8.938	0.000	0.405	4.782	0.786	111.801	0.165	0.000	0.042	2.278	0.148	0.000	1.605	0.000	0.000	3	1.48			2.36	21.07
Frangipane galette	5.366	53.964	356.177	5.001	20.809	36.774	0.675	0.000	35.473	13.239	24.227	0.709	11.806	8.573	77.317	71.790	0.046	0.422	5.147	195.168	0.138	0.584	0.053	23.300	0.270	5.474	0.697	0.769	0.086	0.010	0.819	0.034	20.700	3	1.38			2.88	40.37
Macaroon	6.596	7.449	453.063	8.034	31.598	34.126	2.470	0.000	22.113	16.207	51.766	1.218	10.544	50.305	165.120	142.963	0.225	0.881	5.186	216.238	0.179	1.363	0.064	20.879	0.180	0.000	0.631	4.617	0.101	0.009	2.718	0.026	15.200	3	1.48			3.01	30.39
Madeleine	7.526	17.883	436.614	7.224	26.465	42.371	4.287	0.000	15.799	12.732	68.297	3.939	2.598	95.704	407.816	68.448	0.531	1.272	2.372	95.348	0.178	0.866	0.042	12.841	0.011	0.072	0.636	4.475	0.080	0.000	2.401	0.002	38.957	3	1.41	26	46	1.84	49.13
Fruitcake	9.315	17.600	426.642	5.224	21.154	53.808	1.189	0.000	18.002	13.989	148.944	0.602	8.620	11.698	93.487	139.081	0.057	0.445	4.351	186.020	0.097	1.058	0.050	13.968	0.145	0.501	0.446	0.698	0.094	0.003	0.767	0.011	28.971	3	1.41			1.67	38.07
Chocolate cake	11.103	26.346	392.536	3.889	17.948	53.822	0.994	0.000	21.411	11.780	62.985	0.621	7.020	9.477	96.475	64.607	0.065	0.334	3.648	159.408	0.079	0.767	0.046	14.056	0.118	1.043	0.440	0.640	0.078	0.004	0.661	0.015	35.030	3	1.41	46	87	2.57	49.08
Eclairs	5.208	27.140	416.532	5.311	22.903	47.223	2.120	0.000	19.844	14.321	213.976	3.069	10.045	27.234	133.787	286.024	0.163	0.640	4.579	150.552	0.139	0.501	0.054	22.196	0.228	0.058	1.142	0.819	0.082	0.009	0.818	0.030	37.720	3	1.69			2.89	42.28
Gingerbread	7.698	16.982	270.234	5.247	13.814	31.204	1.298	0.000	46.408	8.464	53.429	1.442	11.720	19.820	149.546	305.849	0.099	0.614	4.506	115.465	0.135	0.726	0.048	16.243	0.251	0.341	0.613	0.621	0.059	0.010	0.591	0.029	16.270	3	1.54			1.47	15.05
Clafoutis	11.075	43.945	341.836	4.413	2.425	75.571	1.791	0.000	14.114	0.807	215.745	1.009	4.536	12.735	100.498	211.569	0.074	0.393	4.155	17.160	0.037	1.375	0.121	8.184	0.000	0.559	0.000	0.382	0.049	0.000	0.435	0.000	31.530	3	1.89			3.15	27.87
Fruit tart	16.168	54.283	189.059	4.306	7.251	26.617	0.944	0.000	59.872	3.856	35.149	0.587	10.734	9.469	140.788	71.506	0.048	0.389	3.748	73.013	0.144	0.429	0.055	23.050	0.261	3.551	0.398	0.433	0.058	0.009	0.355	0.029	13.000	3	2.06			3.47	14.28
Apple pie	16.841	55.009	143.570	3.001	5.588	20.310	0.981	0.000	68.387	3.198	42.518	0.635	8.084	10.214	128.303	54.504	0.055	0.383	2.507	58.169	0.081	0.464	0.038	7.716	0.152	5.826	0.244	0.449	0.043	0.010	0.330	0.022	6.700	3	1.58			1.45	17.87
chocolate biscuit	7.755	8.947	260.459	2.474	11.472	36.819	1.390	0.000	47.515	7.722	9.682	0.488	2.588	7.079	70.121	121.124	0.046	0.210	2.254	95.580	0.028	0.743	0.035	5.518	0.000	0.506	0.176	0.432	0.051	0.000	0.407	0.000	16.400	3	1.52			2.11	30.06
Shortbread	7.769	11.596	441.959	7.106	19.498	59.506	3.052	0.000	8.245	12.077	71.357	3.494	12.014	42.754	254.665	58.850	0.235	0.792	4.616	68.656	0.149	1.400	0.067	13.846	0.109	0.100	0.614	0.690	0.067	0.000	0.726	0.002	30.886	3	1.48	9	57	1.81	46.98
Galette Bretonne St-Michel	8.027	9.180	425.729	6.252	19.231	56.890	1.684	0.000	14.267	12.740	124.889	0.716	8.536	13.985	106.486	502.761	0.076	0.518	4.998	163.602	0.082	1.517	0.059	12.927	0.101	0.145	0.363	0.680	0.086	0.002	0.753	0.006	22.000	3	1.49			1.95	37.59
Petit-beurre	19.838	9.561	440.721	7.129	21.738	54.134	1.575	0.000	14.726	14.472	74.849	0.705	11.147	17.098	149.399	70.690	0.076	0.626	5.209	186.213	0.143	1.457	0.066	14.644	0.202	0.417	0.411	0.734	0.095	0.002	0.811	0.007	20.000	3	1.52	9	51	1.86	26.13
Butter croissant	8.242	19.099	416.034	6.355	16.775	59.891	1.845	0.000	14.884	7.960	22.936	0.754	8.203	13.482	99.845	52.325	0.078	0.520	5.433	95.101	0.069	1.650	0.061	13.199	0.078	0.079	0.240	2.422	0.095	0.002	2.455	0.007	22.997	3	1.39	26	67	2.22	46.28
Brioche	12.648	18.376	410.479	5.883	26.978	36.041	1.511	0.000	28.457	18.041	43.589	0.724	9.246	13.823	116.399	256.494	0.066	0.687	4.947	233.068	0.113	1.469	0.061	26.196	0.133	0.246	0.511	0.873	0.115	0.004	0.939	0.010	7.200	3	1.63			3.10	26.59
Viennese bread/brioche	16.397	25.662	355.527	7.793	20.157	35.727	1.826	0.000	33.433	12.600	29.948	1.087	14.117	14.651	128.571	191.388	0.077	1.077	7.111	186.137	0.205	1.884	0.091	62.123	0.272	0.050	0.669	0.831	0.089	0.010	0.894	0.033	5.890	3	1.74			2.53	18.72
Concentrated orange juice	5.537	73.627	326.922	8.075	12.562	45.384	2.109	0.000	30.930	7.714	32.581	0.942	12.121	15.631	127.561	220.428	0.087	0.694	6.402	111.788	0.137	1.974	0.081	31.251	0.173	0.164	0.376	0.627	0.063	0.005	0.670	0.018	5.090	3	3.68	12	52	7.39	3.47
Kir	8.327	37.459	42.400	0.670	0.150	9.000	0.140	0.000	89.200	0.030	13.300	0.130	0.400	11.600	180.000	2.420	0.030	0.040	0.600	0.000	0.020	0.270	0.050	23.400	0.000	34.100	0.000	0.120	0.018	0.000	0.029	0.000	1.500	3	2.32			1.02	1.02
Whiskey	10.831	18.957	96.942	0.062	0.000	7.877	0.000	9.310	79.820	0.000	7.635	0.595	0.900	6.208	83.828	1.755	0.024	0.090	0.191	0.000	0.027	0.074	0.046	0.777	0.000	0.910	0.000	0.095	0.000	0.000	0.000	0.000	0.000	3	1.52			0.10	0.01
Candy	5.079	7.070	239.000	0.000	0.000	0.000	0.000	34.100	63.400	0.000	0.730	0.050	1.500	0.110	2.300	0.600	0.045	0.020	0.000	0.000	0.003	0.030	0.000	0.000	0.000	0.000	0.000	0.000	0.000	0.000	0.000	0.000	0.000	3	1.39	72	78	0.35	4.85
Jelly	5.480	10.591	338.700	1.400	3.500	75.400	0.200	0.000	4.400	2.800	8.870	0.470	6.000	2.400	84.700	43.000	0.086	0.040	1.800	0.000	0.030	0.040	0.000	0.000	0.000	0.000	0.000	0.000	0.000	0.000	0.000	0.000	75.400	3	1.60			0.97	50.58
Jams	43.154	38.873	220.000	0.460	0.270	54.400	1.000	0.000	43.800	0.012	19.500	0.470	1.400	5.500	88.400	20.600	0.090	0.040	0.500	0.000	0.020	0.080	0.020	10.000	0.000	15.000	0.000	0.070	0.054	0.000	0.075	0.000	40.000	3	1.66	33	51	1.07	26.90
Sorbet	10.445	32.192	109.453	0.310	0.212	26.523	1.730	0.000	70.756	0.013	7.345	0.164	0.748	6.170	72.823	1.921	0.042	0.086	0.979	0.000	0.039	0.128	0.033	6.963	0.000	6.007	0.000	0.274	0.026	0.000	0.061	0.000	22.000	3	2.19			1.48	14.71
Milk chocolate	6.796	8.616	529.491	7.895	35.296	45.125	3.788	0.000	1.751	15.200	156.120	4.327	24.129	92.859	598.311	63.437	0.615	1.280	3.372	29.158	0.356	0.581	0.137	29.465	0.302	0.597	0.000	5.362	0.098	0.000	2.910	0.000	39.520	3	1.24	12	43	2.98	50.27
Chocolate mousse	7.512	31.863	274.813	6.900	15.659	26.582	1.212	0.000	47.282	8.465	87.380	2.754	26.333	29.615	209.588	58.930	0.151	0.882	13.686	106.792	0.294	0.202	0.055	36.926	0.911	0.335	0.961	1.352	0.062	0.030	0.746	0.068	24.288	3	1.75			4.88	29.85
Chocolate truffle	8.156	6.755	498.200	6.210	33.760	42.380	2.500	0.000	13.470	18.488	157.000	1.750	0.000	48.000	297.000	68.000	0.366	1.550	3.400	142.000	0.250	0.299	0.032	9.000	0.490	0.100	0.218	1.820	0.171	0.000	0.779	0.000	20.000	3	1.20			2.16	42.30
Whipped cream	8.270	7.242	339.608	1.899	30.870	13.487	0.000	0.000	54.203	19.620	63.100	0.119	9.920	6.300	93.800	31.700	0.010	0.451	1.230	225.000	0.096	0.063	0.016	1.800	0.162	0.720	0.180	0.630	0.251	0.000	0.413	0.000	9.780	3	1.20	3	31	1.85	36.69
Sweet chocolate powder	8.356	12.750	377.000	6.200	3.900	79.200	6.600	0.000	1.400	2.300	84.700	11.800	2.000	114.000	563.000	60.100	0.069	0.970	2.200	0.000	0.186	4.500	0.640	76.300	0.700	10.000	0.000	3.500	0.003	0.000	0.103	0.000	73.700	3	1.76			5.25	53.47
Chocolate/vanilla ice cream	10.481	26.303	183.464	3.806	10.401	18.651	1.100	0.000	65.229	7.179	115.959	0.611	9.702	24.328	234.176	40.047	0.117	0.567	2.228	74.913	0.186	0.223	0.035	10.178	0.200	0.731	0.050	0.202	0.063	0.000	0.163	0.008	12.550	3	1.89	9	68	3.02	19.81
Flavored ice cream	14.079	31.876	239.243	4.387	12.685	26.851	1.310	0.000	53.030	6.019	63.215	0.624	9.124	25.997	226.274	142.511	0.117	0.435	4.092	76.810	0.112	0.825	0.080	18.968	0.248	0.711	0.171	1.668	0.060	0.007	0.996	0.021	23.590	3	1.72	14	61	3.00	26.85
Dark chocolate	22.142	8.890	535.018	7.198	37.563	42.077	7.030	0.000	0.630	18.300	103.000	10.850	3.400	121.000	459.517	13.000	0.664	1.461	2.800	0.000	0.144	0.729	0.255	34.804	0.022	0.125	1.811	3.550	0.077	0.000	1.284	0.003	36.210	3	1.32			3.32	52.05
Toasted sandwiches (homemade)	5.008	48.524	285.714	15.700	16.302	19.126	1.243	0.000	43.808	9.473	315.135	1.146	10.169	38.002	211.864	818.170	0.131	2.483	4.172	108.080	0.174	1.584	0.135	13.230	0.616	0.000	0.576	0.382	0.114	0.000	0.814	0.035	0.000	3	2.17			4.28	25.88
Pizzas	5.795	34.123	243.718	11.319	14.436	17.139	1.722	0.000	53.509	5.253	197.125	1.112	10.776	23.262	252.118	515.844	0.121	1.827	5.506	59.960	0.161	1.613	0.121	35.841	0.581	2.057	0.174	1.342	0.140	0.006	0.828	0.015	0.000	3	2.05	7	30	4.55	15.23
Crackers	6.467	6.327	475.000	8.300	17.500	71.000	2.600	0.000	4.100	10.300	72.000	2.900	8.000	29.000	152.000	1061.000	0.200	0.750	0.000	0.000	0.260	3.500	0.040	27.000	0.000	0.000	0.000	1.650	0.085	0.000	1.384	0.000	0.000	3	1.56	57	78	2.01	30.56
Potato chips	10.788	7.526	504.000	6.100	34.400	42.400	4.100	0.000	2.800	7.940	31.000	1.610	87.500	50.000	1164.000	707.000	0.170	0.590	2.200	0.000	0.120	4.690	0.500	66.000	0.000	28.000	0.000	4.490	0.039	0.000	3.571	0.000	0.000	3	1.20	26	54	3.33	22.00
Canapés (various fillings)	14.566	19.572	273.378	9.137	13.461	28.922	2.577	0.000	42.296	5.475	133.878	1.733	11.946	28.936	196.011	621.923	0.137	1.482	9.112	97.765	0.181	1.969	0.107	44.436	0.731	11.506	0.381	1.128	0.306	0.074	1.236	0.023	0.000	3	1.89			6.03	17.06
Cocoa Powder	7.884	8.108	300.000	19.500	19.000	12.800	20.100	0.000	3.800	11.200	102.000	20.000	2.900	536.000	3373.000	20.500	3.800	8.100	3.200	0.000	0.220	2.370	0.090	33.000	0.000	0.000	0.000	0.500	0.323	0.000	0.508	0.000	0.000	3	5.00			13.84	17.26
